# 1 **A catalog of single nucleotide changes distinguishing modern humans from archaic hominins**

2

3 Martin Kuhlwilm<sup>1</sup>, Cedric Boeckx<sup>2,3,4</sup>

4 <sup>1</sup> Universitat Pompeu Fabra, Institute for Evolutionary Biology, Barcelona, Spain

5 <sup>2</sup> ICREA, Barcelona, Spain

6 <sup>3</sup> University of Barcelona, Barcelona, Spain

7 <sup>4</sup> UB Institute of Complex Systems, Barcelona, Spain

8

9

## 10 **Abstract**

11 Throughout the past decade, studying ancient genomes provided unique insights into human  
12 prehistory, and differences between modern humans and other branches like Neanderthals can  
13 enrich our understanding of the molecular basis of unique modern human traits. Modern human  
14 variation and the interactions between different hominin lineages are now well studied, making it  
15 reasonable to go beyond fixed changes and explore changes that are observed at high frequency in  
16 present-day humans. Here, we identify 571 genes with non-synonymous changes at high frequency.  
17 We suggest that molecular mechanisms in cell division and networks affecting cellular features of  
18 neurons were prominently modified by these changes. Complex phenotypes in brain growth  
19 trajectory and cognitive traits are likely influenced by these networks and other changes presented  
20 here. We propose that at least some of these changes contributed to uniquely human traits, and  
21 should be prioritized for experimental validation.

22

23 Corresponding author contact information:

24 Cedric Boeckx

25 Email: [cedric.boeckx@ub.edu](mailto:cedric.boeckx@ub.edu)

26 Phone: +34 93 403 3782

27 ICREA/Universitat de Barcelona

28 Gran Via de les Corts Catalanes, 585

29 08007 Barcelona, Spain

30

## 31 **Introduction**

32

33 *Homo sapiens* appears to be a “very special primate” (Pääbo 2014). Our position among animal  
34 species stands out largely thanks to the composite complexity of our cultures, social structures and  
35 communication systems. It seems reasonable that this “human condition” is rooted, at least in part,  
36 in the properties of our brain, and that these can be traced to changes in the genome on the modern  
37 human lineage. This phenotype in the population called “anatomically modern humans” emerged in  
38 Africa likely before the deepest divergence less than 100,000-200,000 years ago (Schlebusch et al.  
39 2012; Kuhlwilm et al. 2016), although complex population structure may reach back up to 300,000  
40 years ago (Hublin et al. 2017; Schlebusch et al. 2017; Skoglund et al. 2017). Except for some early  
41 dispersals (Rabett 2018), humans most likely peopled other parts of the world than Africa and the  
42 Middle East permanently only after around 65,000 years ago. It has been claimed that the brain of  
43 modern humans adopted a specific, apomorphic growth trajectory early in life that gave rise to the  
44 skull shape difference between modern humans and extinct branches of the genus *Homo* (Hublin et  
45 al. 2015). Importantly, the growth pattern might differ between the populations (Gunz et al. 2010;  
46 Neubauer et al. 2018), while the brain size and encephalization of humans and Neanderthals is  
47 similar, with slightly larger brains in the latter (Trinkaus and Howells 1979; Schoenemann 2004;  
48 Hublin et al. 2015). This ontogenic trajectory, termed the “globularization phase”, might have  
49 contributed to cognitive changes that underlie behavioral traits in which humans differ from their  
50 extinct relatives, despite mounting evidence for their cognitive sophistication (Gunz et al. 2012;  
51 Hublin et al. 2015; Wynn et al. 2016; Boeckx 2017; Hoffmann et al. 2018).

52 We are now in a favorable position to examine the evolution of human biology with the help of  
53 the fossil record, in particular thanks to breakthroughs in paleogenomics: The recent reconstruction  
54 of the high quality genomes of members of archaic *Homo* populations (Meyer et al. 2012; Prüfer et  
55 al. 2014; Prüfer et al. 2017) has opened the door to new comparative genomic approaches and  
56 molecular analyses. The split of the lineages leading to modern humans and other archaic forms  
57 (Neanderthals and Denisovans) is estimated to around 600,000 years ago (Kuhlwilm et al. 2016),  
58 setting the timeframe for truly modern human-specific changes after this split, but before the  
59 divergence of modern human populations (Fig. 1). Together with efforts to explore present-day  
60 human diversity (Auton et al. 2015), this progress has allowed to narrow down the number of  
61 candidate point mutations from ~35 million differences since the split from chimpanzee when  
62 comparing only reference genomes (Consortium 2005) to 31,389 fixed human-specific changes in a  
63 previous seminal study (Pääbo 2014). Other types of more complex changes like structural variants  
64 most likely contributed to human-specific traits. For example, it is well known that since the split  
65 from chimpanzees functional differences arose through gene duplications in *ARHGAP11B* and other  
66 genes (Florio et al. 2015; Ju et al. 2016), copy number variants in *SRGAP2* and other genes (Dennis  
67 et al. 2012; Dumas et al. 2012; Suzuki et al. 2018) or regulatory deletions (McLean et al. 2011). In

68 these cases, the variants arose before the split of humans and Neanderthals, but the differences in  
69 structural variation that exist between the hominin lineages (Chintalapati et al. 2017) need to be  
70 explored in more detail, with advancement of technologies in ancient DNA sequencing and  
71 computational methods. This will result in complementary lists of changes for understanding the  
72 human condition outside the scope of this study. Beyond that, parts of the genome which are  
73 complex and not yet examined by conventional sequencing platforms (O’Bleness et al. 2012)  
74 possibly harbor important human-specific changes as well.

75 Some of the single nucleotide changes have been linked to putative functional consequences  
76 (Castellano et al. 2014; Pääbo 2014; Prüfer et al. 2014), and evidence is mounting that several  
77 molecular changes affecting gene expression in the brain were subject to selective pressures (Green  
78 et al. 2010; Somel et al. 2013; Zhou et al. 2015; Racimo 2016; Peyrégne et al. 2017). Furthermore,  
79 the genomic impact of interbreeding events is not evenly distributed across the genome. Genes  
80 expressed in regions of the brain regarded as critical for certain cognitive functions such as  
81 language are depleted in introgressed archaic genetic material (Sankararaman et al. 2014; Vernot  
82 and Akey 2014; Sankararaman et al. 2016; Vernot et al. 2016), and introgressed alleles are  
83 downregulated in some of these brain regions, suggesting natural selection acting on tissue-specific  
84 gene regulation (McCoy et al. 2017). Thus, it seems reasonable to conclude that there were  
85 differences between anatomically modern human and Neanderthal brains, and that these underlie at  
86 least some of the characteristics of our lineage (Wynn and Coolidge 2004). We want to emphasize  
87 that such recent differences are likely to be subtle when compared to those after the split from our  
88 closest living relatives on a scale of 6-10 million years (Langergraber et al. 2012), where  
89 fundamental changes arose since the divergence from chimpanzees and bonobos (Varki and  
90 Altheide 2005; O’Bleness et al. 2012). The observation of recurrent gene flow between modern  
91 human and archaic populations also implies a broad overall similarity, yet, such subtle differences  
92 may still have contributed to the evolutionary outcome (Wynn et al. 2016). This does not imply a  
93 superiority of humans, but specific changes that might have facilitated survival under the given  
94 environmental conditions. Obviously, not all human-specific changes are beneficial: While most  
95 mutations may be rather neutral and have little effect on the phenotype, some may have had  
96 deleterious effects or side-effects, possibly increasing the risks for neurodevelopmental or  
97 neurodegenerative disorders in humans (Bufill et al. 2011; Bruner and Jacobs 2013; Bufill et al.  
98 2013).

99 The goal of this paper is to provide a revised, extended set of recent single nucleotide changes in  
100 humans since their split from Neanderthals that could enrich our understanding of the molecular  
101 basis of recent human condition. The previous focus on fixed alleles was reasonable given limited  
102 data (Pääbo 2014), but having a better grasp of the magnitude of modern human variation and the  
103 interaction between different hominin lineages seems a good reason to cast a wider net, and take  
104 into account not only fixed differences but also high-frequency changes shared by more than 90%

105 of present-day individuals. Here, we present a revised list of 36 genes that carry missense  
106 substitutions which are fixed across thousands of human individuals and for which all archaic  
107 hominin individuals sequenced so far carry the ancestral state. In total, 647 protein-altering changes  
108 in 571 genes reached a frequency of at least 90% in the present-day human population. We attempt  
109 to interpret this list, as well as some regulatory changes, since it seems very likely that some of  
110 these genes would have contributed to the human condition. We discuss some of their known  
111 functions, and how these relate to pathways that might have been modified during human evolution  
112 from the molecular level to cellular features and more complex phenotypic traits (Fig. 1). We  
113 restrict our attention to genes where the literature may allow firm conclusions and predictions about  
114 functional effects, since many genes likely have multiple different functions (Gratten and Visscher  
115 2016). Obviously, it cannot be emphasized enough that ultimately, experimental validation will be  
116 needed to confirm our hypotheses concerning alterations in specific functions. For example,  
117 transcription factors or enzymatically active proteins can be tested using cell cultures or *in vitro*  
118 assays, while brain organoids could be used to test differences in neuronal functions (Giandomenico  
119 and Lancaster 2017), especially in combination with single-cell RNA sequencing (Camp et al. 2015;  
120 Camp and Treutlein 2017). Ultimately, these variants can be introduced into model organisms like  
121 mice to test complex features related to cognitive abilities or behavior (Enard et al. 2009). Still,  
122 given limitations to the amount of changes that can be tested at once, networks which are modified  
123 by multiple changes cannot be tested with current technologies.

124

125

## 126 **Results**

127

### 128 **Genetic differences between present-day humans and archaic hominins**

129 Using publicly available data on one Denisovan and two Neanderthal individuals and present-  
130 day human variation (Methods), we calculated the numbers of single nucleotide changes (SNCs)  
131 which most likely arose recently on the respective lineages after their split from each other, and  
132 their functional consequences (Table 1). Previously, a number of 31,389 sites has been reported as  
133 recently fixed derived in present-day humans, while being ancestral in archaics (Pääbo 2014; Prüfer  
134 et al. 2014). We find a smaller number of only 12,027 positions in the genome, in part because of  
135 including another archaic individual and different filters, but mainly by a richer picture of present-  
136 day human variation. The 1,000 Genomes Project as well as other sources contributing to the  
137 dbSNP database now provide data for thousands of individuals, which results in very high allele  
138 frequencies for many loci instead of fixation. Indeed, 29,358 positions show allele frequencies  
139 larger than 0.995, demonstrating that the level of near-fixation is similar to the level of previously  
140 presented fixation. The number of loci with high frequency (HF) changes of more than 90% in

141 present-day humans is an order of magnitude larger than the number of fixed differences. The three  
142 archaic individuals carry more than twice as many changes than present-day humans; however, we  
143 emphasize that much of this difference is not due to more mutations in archaics, but rather the fact  
144 that data for only three individuals is available, compared to thousands of humans. The variation  
145 across the archaic population is not represented equally well, which makes these numbers not  
146 directly comparable. On the other hand, much less variation is found by the sequencing of each  
147 additional Neanderthal individual compared to humans due to the low diversity of Neanderthals  
148 (Fig. S36 in (Kuhlwilm et al. 2016)). This low diversity across their geographic range suggests that  
149 most alleles observed as ancestral here will be the same state in other individuals. Furthermore, we  
150 take variability into account due to gene flow or errors, decreasing the possibility that positions  
151 ancestral in the archaic individuals studied to date turn out to be derived in most archaic individuals,  
152 hence this extended catalog will likely not undergo drastic changes. However, changes in structural  
153 variants or regions of the genome that are not accessible by current sequencing technologies will  
154 most likely complement our results (O’Bleness et al. 2012).

155 Present-day humans carry 42 fixed amino acid-changes in 36 genes (Table 2, Fig. 2), while  
156 Neanderthals carry 159 such changes. Additionally, modern humans carry 605 amino acid-changes  
157 at high frequency (human-lineage high-frequency missense changes, referred to as HHMCs),  
158 amounting to a total of 647 such changes in 571 genes (Table S1). Together with 323 SNCs on the  
159 human lineage with low confidence (Methods, Table S2), almost 1,000 putative protein-altering  
160 changes were found across most present-day humans. Generally, synonymous changes are found at  
161 a similar magnitude as missense changes, but only few SNCs altering start and stop codons, and  
162 thousands of changes in putative regulatory and untranslated regions. We admit that some of the  
163 loci presented here are variable across the phylogenetic tree, or less reliable due to low coverage in  
164 the archaics, but we accept this since our intention is retrieve an inclusive picture of possibly  
165 functional recent changes. The 42 protein-altering changes for which the ancestral allele has not  
166 been observed in any present-day human, most of which have been presented before (Pääbo 2014),  
167 constitute without doubt the strongest entry points into a molecular understanding of the human  
168 condition, and should be prime candidates for experimental validation. Only one gene, *SPAG5*,  
169 carries three such SNCs, and four genes (*ADAM18*, *CASC5*, *SSH2* and *ZNHIT2*) carry two fixed  
170 protein-coding changes in all modern humans. We identified 15 SNCs (in *AHR*, *BOD1L1*,  
171 *C1orf159*, *C3*, *DNHD1*, *DNMT3L*, *FRMD8*, *OTUD5*, *PROM2*, *SHROOM4*, *SIX5*, *SSH2*, *TBC1D3*,  
172 *ZNF106*, *ZNHIT2*) that have not been previously described as fixed differences between humans  
173 and archaics. We note that another 12 previously described (Pääbo 2014) protein-altering  
174 substitutions were not found among the genotypes analyzed here (in *C21orf62*, *DHX29*,  
175 *FAM149B1*, *FRRS1L*, *GPT*, *GSR*, *HERC5*, *IFI44L*, *KLF14*, *PLAC1L*, *PTCD2*, *SCAF11*). These  
176 genotype calls are absent from the files provided for the three archaic genomes due to different  
177 genotype calling and filtering procedures compared to the original publication of the Altai

178 Neanderthal genome (Prüfer et al. 2014; Prüfer et al. 2017). Hence, some potentially relevant  
 179 candidate changes were not included here, and future research is necessary to evaluate these as well.  
 180 Despite attempting an extended interpretation, our data is thus not fully exhaustive.

181 It is noteworthy that the number of fixed SNCs decreased substantially, and it is possible that  
 182 single individuals will be found to carry some of the ancestral alleles for the remaining fixed sites.  
 183 Hence, it is important to focus not only on fixed differences, but also consider variants at high  
 184 frequency. When analyzing the 647 HHMCs, 68 genes carry more than one amino acid-altering  
 185 change. Among these, *TSGA10IP* (Testis Specific 10 Interacting Protein) and *ABCC12* (ATP  
 186 Binding Cassette Subfamily C Member 12) carry four such changes, and seven more genes  
 187 (*MUC5B*, *NPAP1*, *OR10AG1*, *OR5M9*, *PIGZ*, *SLX4*, *VCAN*) carry three HHMCs. 1,542 genes carry  
 188 at least one HF missense change on the archaic lineage (archaic-lineage high-frequency missense  
 189 change, referred to as AHMC, Tables S3, S4). We find an overlap of 122 genes with HHMCs and  
 190 AHMCs, which is more than expected considering that among 1,000 sets of random genes of a  
 191 similar length distribution, no overlap of this extent was observed. The same genes seem to have  
 192 acquired missense changes on both lineages since their divergence more often than expected. We  
 193 find a high ratio of HHMCs over synonymous changes for chromosome 21 (1.75-fold), and a very  
 194 small ratio (0.18-fold) for chromosome 13. We do not find such extreme ratios for AHMCs and  
 195 corresponding synonymous changes, suggesting differences in the distribution of amino acid  
 196 changes between both lineages (Fig. S1).

197

|                           | <b>Fixed human</b> | <b>HF human</b> | <b>Extended human</b> | <b>Fixed archaic</b> | <b>HF archaic</b> | <b>Extended archaic</b> |
|---------------------------|--------------------|-----------------|-----------------------|----------------------|-------------------|-------------------------|
| <b>All</b>                | 12,027             | 136,435         | 83,254                | 33,498               | 380,756           | 983                     |
| <b>Non-synonymous</b>     | 42                 | 647             | 327                   | 167                  | 1,921             | 13                      |
| <b>Synonymous</b>         | 41                 | 843             | 363                   | 193                  | 2,123             | 14                      |
| <b>Start/stop</b>         | 1                  | 14              | 10                    | 3                    | 48                | 2                       |
| <b>Splice site</b>        | 4                  | 23              | 8                     | 4                    | 54                | 0                       |
| <b>TFBS</b>               | 28                 | 226             | 126                   | 87                   | 914               | 1                       |
| <b>Upstream</b>           | 1,935              | 19,599          | 11,235                | 4,920                | 55,188            | 289                     |
| <b>5' UTR</b>             | 180                | 1,853           | 1,012                 | 195                  | 2,016             | 7                       |
| <b>3' UTR</b>             | 77                 | 702             | 334                   | 506                  | 5,303             | 19                      |
| <b>Downstream</b>         | 1,922              | 19,704          | 11,673                | 4,956                | 55,832            | 281                     |
| <b>miRNA</b>              | 0                  | 1               | 2                     | 0                    | 4                 | 0                       |
| <b>Regulatory element</b> | 1,952              | 20,971          | 12,320                | 5,125                | 59,248            | 195                     |

198 **Table 1:** Summary of single nucleotide changes. TFBS: Transcription factor binding sites. UTR:  
 199 Untranslated Region. HF: High frequency. Fixed changes are a subset of HF changes.

200

201

202

## 203 **Ranking and enrichment**

204 We assessed the impact of mutations for different deleteriousness scores (Table 2), finding 12  
205 genes with deleterious HHMCs according to SIFT, three according to PolyPhen, and 16 when using  
206 the Grantham score ( $>180$ ), measuring the physical properties of amino acid changes. The C-score  
207 and GWAVA can be used to rank all mutation classes, and we present the top candidates.

208 Then, we attempted a ranking of genes by the density of lineage-specific changes in the dataset.  
209 As expected, the total number of segregating sites is correlated with gene length (Pearsons'  $R =$   
210  $0.93$ ). This correlation is weaker for HF human SNCs ( $R = 0.73$ ) and fixed human-specific SNCs ( $R$   
211  $= 0.25$ ), as well as for fixed ( $R = 0.37$ ) and HF ( $R = 0.82$ ) SNCs in archaics. We conclude that some  
212 genes with a large number of human-specific changes might carry these large numbers by chance,  
213 while others are depleted. Indeed, 17,453 (88.9%) of these genes do not carry any fixed human-  
214 specific change, and 80.5% do not carry fixed archaic-specific changes. Of note, genes that have  
215 attracted attention in the context of traits related to the "human condition" like *CNTNAP2* and  
216 *AUTS2* are among the longest genes in the genome, hence changes in these genes should be  
217 interpreted with caution as they are not unexpected. We ranked the genes by the number of HF  
218 changes in either modern humans or archaics, divided by their genomic lengths, and categorize the  
219 top 5% of this distribution as putatively enriched for changes on each lineage (Table S5). We note  
220 that 191 genes (30.9%) fall within this category for both human HF changes and archaic HF  
221 changes, as a result of differences in mutation density. In order to distinguish a truly lineage-specific  
222 enrichment, we calculated the ratios of HF changes for humans and archaics, defining the top 10%  
223 of genes in this distribution as putatively enriched (Table S5). Among the genes enriched for  
224 changes on the modern human lineage, 18 carry no HF changes on the archaic lineage, and ten of  
225 these also fall within the 5% of genes carrying many changes considering their length (*ARSJ*,  
226 *CLUAP1*, *COL20A1*, *EPPIN*, *KLHL31*, *MKNK1*, *PALMD*, *RIC3*, *TDRD7*, *UBE2H*). These might be  
227 candidates for an accumulation of changes, even though this is not identical to selective sweep  
228 signals. Among these, the collagen *COL20A1* and the Epididymal Peptidase Inhibitor *EPPIN* carry  
229 HHMCs. *ACAD10*, *DST* and *TTC40*, which carry two HHMCs, might be other notable genes with a  
230 human-specific enrichment.

231 Gene Ontology (GO) categories are neither enriched for HHMCs on the human lineage in a  
232 hypergeometric test, nor for genes carrying AHMCs, HF changes in UTRs or transcription factor  
233 binding sites. However, instead of singular changes that might be observed more often in long  
234 genes, or genes that are more prone to mutations in hominins, the density of HF changes in a gene  
235 might yield a better picture of lineage-specific changes, possibly for cumulative changes. We  
236 applied a test for the ratio of the number of gene-wise HF changes on one lineage over the other  
237 lineage, finding an enrichment for 12 GO categories on the human lineage (Table S6), with "soft  
238 palate development", "negative regulation of adenylate cyclase activity", "collagen catabolic  
239 process" and "cell adhesion" in the biological process category. Among the cellular components

240 category, the “postsynaptic membrane”, “spermatoproteasome complex”, “collagen trimer”,  
241 “dendrite” and “cell junction” show enrichment, as well as the molecular functions “calcium ion  
242 binding”, “histone methyltransferase activity (H3-K27 specific)” and “metallopeptidase activity”.  
243 We find no GO enrichment for genes with an excess of changes on the archaic lineage. In order to  
244 approach a deeper exploration of genes with associated complex traits in humans, we explored the  
245 NHGRI-EBI GWAS Catalog (MacArthur et al. 2017), containing 2,385 traits. We performed a  
246 systematic enrichment screen, finding 17 unique traits enriched for genes with HHMCs, and 11 for  
247 genes with AHMCs (Table S7). Changes in genes associated to “Cognitive decline (age-related)”,  
248 “Rheumatoid arthritis” or “Major depressive disorder” might point to pathways that could have  
249 been influenced by protein-coding changes on the human lineage. In archaics, genes are enriched,  
250 among others, for associations to traits related to body mass index or cholesterol levels, which  
251 might reflect differences in their physiology.

252 We find a significant enrichment of protein-protein interactions ( $P = 0.006$ ) among the gene  
253 products of HHMC genes (Fig. S2), meaning that these proteins interact with each other more than  
254 expected. Functional enrichment is found for the biological process “cellular component assembly  
255 involved in morphogenesis”, most strongly for the cellular components cytoskeleton and  
256 microtubule, as well as the molecular function “cytoskeletal protein binding”. Three proteins have  
257 at least 20 interactions in this network and might be considered important nodes: TOP2A, PRDM10  
258 and AVPR2 (Table S8). However, proteins encoded by genes with synonymous changes on the  
259 modern human lineage seem to be enriched for interactions as well ( $P = 0.003$ ), as are proteins  
260 encoded by genes with AHMCs ( $P = 1.68 \times 10^{-14}$ ), with an enrichment in GO categories related to  
261 the extracellular matrix and the cytoskeleton, and proteins with more than 40 interactions (Table  
262 S8). We caution that these networks might be biased due to more mutations and possibly more  
263 interactions in longer, multi-domain genes.

264 Regulatory changes might have been important during our evolution (Wray 2007), hence we  
265 tested for an overrepresentation of transcription factors. We find 78 known or putative transcription  
266 factors among the HHMC genes (Table S9) on the modern human lineage (Chawla et al. 2013),  
267 which is not overrepresented among genes with HHMCs (with 49.2% of random genes sets  
268 containing fewer HHMCs). Despite no enrichment as a category, single transcription factors on the  
269 modern human lineage might have been important, particularly those with an excess of modern  
270 human over archaic HF changes (*AHR*, *MACC1*, *PRDM2*, *TCF3*, *ZNF420*, *ZNF516*). Others, like  
271 *RB1CC1* (Prüfer et al. 2014) or *PRDM10* and *NCOA6* (Peyrégne et al. 2017) have been found in  
272 selective sweep screens, suggesting contributions of individual transcription factors, rather than the  
273 class of proteins. We also tested for an enrichment of gene expression in different brain regions and  
274 developmental stages (Miller et al. 2014; Grote et al. 2016), using the HF synonymous changes on  
275 each lineage as background sets. We find an enrichment of gene expression in the orbital frontal  
276 cortex at infant age (0-2 years) for genes with HHMCs, but no enrichment for genes with AHMCs.



277 Furthermore, when testing the genes with HHMCs and using the set of genes with AHMCs as  
 278 background, “gray matter of forebrain” at adolescent age (12-19 years) is enriched, while no  
 279 enrichment was found for genes with AHMCs.

280

|                       |                                                                                                                                                                                                                                                                                                                                             |
|-----------------------|---------------------------------------------------------------------------------------------------------------------------------------------------------------------------------------------------------------------------------------------------------------------------------------------------------------------------------------------|
| <b>Fixed HHMCs</b>    | <i>ADAM18, ADSL, AHR, ANKMY1, ANKRD30A, BBIP1, BOD1L1, C1orf159, C3, CASC5, CDH16, DCHS1, DNHD1, DNMT3L, FRMD8, GBP5, GLDC, GREB1L, GRM6, KIF26B, LMNB2, NCOA6, NOTO, OTUD5, PRDM10, PROM2, RFNG, SCAP, SHROOM4, SIX5, SPAG5, SSH2, TBC1D3, ZNF106, ZNF185, ZNHIT2</i>                                                                      |
| <b>Selection 2014</b> | <i>C11orf80, CKAP5, GREB1L, HMCN1, NLRX1, PDZD3, PRDM2, RB1CC1</i>                                                                                                                                                                                                                                                                          |
| <b>Selection 2015</b> | <i>MSS51, NCOA6, OMD, SPAG17, SPAG5</i>                                                                                                                                                                                                                                                                                                     |
| <b>Selection 2016</b> | <i>ACE, ADSL, ALMS1, ANKRD30A, BZRAP1, DNAH1, GREB1L, KMT2C, NWD1, PROM2, RASA1, STAB1, STARD9, ZNF106</i>                                                                                                                                                                                                                                  |
| <b>Selection 2017</b> | <i>ADSL, AKAP8, BAP1, BBIP1, BCAR3, CAPN5, CR2, CSMD2, DNAH1, ENTHD1, FAAH, FRMD8, GBP5, GBP7, GPR157, GTF3C5, HERC5, HERC6, HMCN1, HRASLS5, KATNA1, KIF15, KIF18A, LYST, MKL1, MYH3, NAALADL1, NCOA6, PRDM10, PRDM2, PROM2, PTPRC, RNF44, SCAP, SLC12A8, SLC25A45, SLITRK1, TIGD3, TMEM235, TRGV4, TTC6, VOPP1, ZNF501, ZNF502, ZNHIT2</i> |
| <b>Grantham</b>       | <i>ABHD14A-ACY1, ACY1, ABHD14A, CCDC158, CCDC30, DNHD1, EML2, ERI1, GBA3, GREB1, OR1K1, TTC6, UBQLN3, UIMC1, ZBP1, ZNF510, ZNHIT2</i>                                                                                                                                                                                                       |
| <b>SIFT</b>           | <i>BEND2, CCT6B, COPA, CUL4B, GBP7, KRTAP10-10, MEPE, NHEJ1, OR1K1, SLC6A15, TPO, ZNF510</i>                                                                                                                                                                                                                                                |
| <b>PolyPhen-2</b>     | <i>FSHR, NLN, TPO</i>                                                                                                                                                                                                                                                                                                                       |
| <b>CADD</b>           | <i>C11orf80, C5orf66, CCT6B, CDH15, CEP128, CPM, FGF21, FMN2, FUT1, H2AFY, HERC6, KCNK5, KPNA4, KRT33A, KRT8P12, MUM1, NR1H2, OPRM1, PDSS2, ROCK1, RPS15P9, SLC22A31, SUCLG2P4, TMPRSS7, UNC5D</i>                                                                                                                                          |
| <b>GWAVA</b>          | <i>ANK2, COPA, CTCR, CYP2B6, MAPK10, MCTP1, SLC38A6, SYT1, YTHDC1</i>                                                                                                                                                                                                                                                                       |

281 **Table 2:** Genes with fixed non-synonymous changes on the human lineage, genes under positive selection  
 282 with HHMCs, and deleterious candidate HHMCs. Selection 2014: Prüfer *et al.*, 2014. Selection 2015: Zhou  
 283 *et al.*, 2015. Selection 2016: Racimo, 2016. Selection 2017: Peyrégne *et al.*, 2017.

284

## 285 Discussion

286

287 The enrichment of broad categories above suggests that traits related to brain functions are  
 288 prominently represented by HHMCs. It should be noted that such results would be less clear if we  
 289 just focused on completely fixed changes, given the drastically reduced number of genes harboring  
 290 such changes. Here, we will further examine the possible impact on the brain that some of these  
 291 changes might have, paying special attention to hypotheses formulated in earlier work on modern  
 292 human-specific changes. Our extended catalog of changes appears to provide additional support for  
 293 some of these hypotheses.

294

### 295 Cell division and the brain growth trajectory

296 It has been proposed previously that protein-coding changes in cell cycle-related genes are highly  
 297 relevant candidates for human-specific traits (Pääbo 2014; Prüfer *et al.* 2014). Indeed, three genes  
 298 (*CASC5*, *SPAG5*, and *KIF18A*) have been singled out as involved in spindle pole assembly during  
 299 mitosis (Pääbo 2014). Other genes with protein-coding SNCs (*NEK6* and *STARD9/KIF16A*) turn

300 out to be implicated in the regulation of spindle pole assembly as well (O’Regan and Fry 2009;  
301 Torres et al. 2017). Among the 15 fixed protein-coding changes identified here but absent from  
302 previous analyses (Pääbo 2014; Prüfer et al. 2014), some might have also contributed to complex  
303 modifications of pathways in cell division, like *AHR* (Puga et al. 2002) or *DNHD1* (Bader et al.  
304 2011) (Supplementary Information 1), as well as other genes with HHMCs, like *CHEK1* (Zachos et  
305 al. 2017) or the gene encoding for the protein TOP2A (Yoshida and Azuma 2016), which shows the  
306 largest number of interactions with other HHMC-carrying proteins, suggesting a function as  
307 interaction hub in the cell division complex (Supplementary Information 1). Taken together, these  
308 changes suggest that the cell cycle machinery might have been modified in a specific way in  
309 humans compared to other hominins.

310 It has been claimed (Prüfer et al. 2014) that genes with fixed non-synonymous changes in  
311 humans are also more often expressed in the ventricular zone of the developing neocortex,  
312 compared to fixed synonymous changes. Since the kinetochore-associated genes *CASC5*, *KIF18A*  
313 and *SPAG5* are among these genes, it has been emphasized that this “may be relevant  
314 phenotypically as the orientation of the mitotic cleavage plane in neural precursor cells during  
315 cortex development is thought to influence the fate of the daughter cells and the number of neurons  
316 generated (Fietz and Huttner 2011)” (Prüfer et al. 2014). Several fixed SNCs on the modern human  
317 lineage are observed for *CASC5* (two changes) and *SPAG5* (three changes), which is also among  
318 genes with a relatively high proportion of HF changes (Table S5). The changes in *KIF18A*, *KIF16A*  
319 and *NEK6* can no longer be considered as fixed, but occur at very high frequencies (>99.9%) in  
320 present-day humans. We attempted to determine whether an enrichment of genes with HHMCs on  
321 the human lineage can be observed in the ventricular zone (Miller et al. 2014), but instead find an  
322 enrichment in the intermediate zone, where less than 5% of random gene sets of the same size are  
323 expressed. However, synonymous HF changes also show an enrichment in this layer, as well as  
324 genes with AHMCs (Table S10), suggesting an overrepresentation of genes that carry mutations in  
325 the coding regions rather than lineage-specific effects. We were able to broadly recapitulate the  
326 observation of an enrichment of expression in the ventricular zone if restricting the test to genes  
327 with non-synonymous changes at a frequency greater than 99.9% in present-day humans, which is  
328 not observed for corresponding synonymous and archaic non-synonymous changes (Table S10).  
329 Among the 28 genes expressed in the ventricular zone that carry almost fixed HHMCs, four might  
330 be enriched for HF changes in humans (*HERC5*, *LMNB2*, *SPAG5*, *VCAM1*), and one shows an  
331 excess of HF changes on the human compared to the archaic lineage (*AMKMY1*). Other notable  
332 genes discussed in this study include *ADSL*, *FAM178A*, *KIF26B*, *SLC38A10*, and *SPAG17*.

333 The centrosome-cilium interface is known to be critical for early brain development, and  
334 centrosome-related proteins are overrepresented in studies on the microcephaly phenotype in  
335 humans (Megraw et al. 2011). We find 126 genes (Table S9) with 143 HHMCs that putatively  
336 interact with proteins at the centrosome-cilium interface (Gupta et al. 2015). Some of the genes

337 listed here and discussed in this study, such as *FMR1*, *KIF15*, *LMNB2*, *NCOA6*, *RB1CC1*, *SPAG5*  
338 and *TEX2*, harbor not only HHMCs, but an overall high proportion of HF changes on the human  
339 lineage. Although an early analysis suggested several candidate genes associated to microcephaly,  
340 not all of these could be confirmed by high-coverage data. Among eleven candidate genes (Green et  
341 al. 2010), only two (*PCNT*, *UCP1*) are among the HHMC gene list presented here, while most of  
342 the other changes are not human-specific, and only *PCNT* has been related to microcephaly (Li et  
343 al. 2015). Nevertheless, more changes related to microcephaly are found on both lineages, for  
344 example in *ATRX* (K. Ritchie et al. 2014) or *CASC5* (Genin et al. 2012) (Supplementary  
345 Information 3).

346 Changes in genes associated with brain growth trajectory differences lead not necessarily to a  
347 decrease but also an increase of brain size (Montgomery et al. 2011), suggesting that the disease  
348 phenotype of macrocephaly might point to genes relevant in the context of brain growth as well.  
349 One of the few genes with several HHMCs, *CASC5*, has been found to be associated with gray  
350 matter volume differences (Shi et al. 2017). It has been claimed that mutations in *PTEN* alter the  
351 brain growth trajectory and allocation of cell types through elevated Beta-Catenin signaling (Chen  
352 et al. 2015). This well-known gene, critical for brain development (Li et al. 2017), has not been  
353 highlighted in the context of human-specific changes, while we find that *PTEN* falls among the  
354 genes with an excess on the modern human over the archaic lineage, suggesting that regulatory  
355 changes in this gene might have contributed to human-specific traits. This is also the case for the  
356 HHMC-carrying transcription factor TCF3, which is known to repress Wnt-Beta-Catenin signaling  
357 and maintain the neural stem cell population during neocortical development (Kuwahara et al.  
358 2014). Changes in these and other genes (Supplementary Information 3) like *CCND2* (Mirzaa et al.  
359 2014), *GLI3* (Jamsheer et al. 2012), or *RB1CC1* (Wang et al. 2013), for which a regulatory SNC  
360 has been suggested to modify transcriptional activity (Weyer and Pääbo 2016) and which carries a  
361 signature of positive selection (Prüfer et al. 2014), could have contributed to the brain growth  
362 trajectory changes hypothesized to give rise to the modern human-specific globular braincase shape  
363 during the past several 100,000 years (Gunz et al. 2012; Hublin et al. 2015; Neubauer et al. 2018).  
364 Finally, we find changes that might have affected the size of the cerebellum, a key contributor to our  
365 brain shape (Kochiyama et al. 2018; Neubauer et al. 2018), such as HF regulatory SNCs in *ZIC1*  
366 and *ZIC4* (Blank et al. 2011), an excess of HF mutations in *AHI1* (Cheng et al. 2012), and a  
367 deleterious HHMC in *ABHD14A*, which is a target of *ZIC1* (Hoshino et al. 2003).

368

### 369 **Cellular features of neurons**

370 To form critical networks during the early development of the brain, axonal extensions of the  
371 neurons in the cortical region must be sent and guided to eventually reach their synaptic targets.  
372 Studies conducted on avian vocal learners (Pfenning et al. 2014; Wang et al. 2015) have shown a  
373 convergent differential regulation of axon guidance genes of the *SLIT-ROBO* families in the pallial

374 motor nucleus of the learning species, allowing for the formation of connections virtually absent in  
375 the brains of vocal non-learners. In modern humans, genes with axon-guidance-related functions  
376 such as *FOXP2*, *SLIT2* and *ROBO2* have been found to lie within deserts of archaic introgression  
377 (Sankararaman et al. 2016; Vernot et al. 2016; Kuhlwilm 2018), suggesting incompatibilities  
378 between modern humans and archaics for these regions. Our dataset contains a fair amount of genes  
379 known to impact brain wiring: Some of the aforementioned microtubule-related genes, specifically  
380 those associated with axonal transport and known to play a role in post-mitotic neural wiring and  
381 plasticity (Lüders 2016), are associated with signals of positive selection, such as *KIF18A*  
382 (McVicker et al. 2016) or *KATNA1* (Ahmad et al. 1999; Karabay et al. 2004). Furthermore, an  
383 interactor of *KIF18A*, *KIF15* (Kevenaer et al. 2017), might have been under positive selection in  
384 modern humans (Peyrégne et al. 2017), and contains two HHMCs. Versican (*VCAN*), which  
385 promotes neurite outgrowth (Wu et al. 2004), carries three HHMCs, and *SSH2* (two HHMCs) might  
386 be involved in neurite outgrowth (Cuberos et al. 2015). *PIEZO1*, which carries a non-synonymous  
387 change that is almost fixed in modern humans, is another factor in axon guidance (Koser et al.  
388 2016), as well as *NOVA1* (Jensen et al. 2000), which is an interactor of *ELAVL4* (Ratti et al. 2008), a  
389 gene that codes for a neuronal-specific RNA-binding protein and might have been under positive  
390 selection in humans (Zhou et al. 2015; Peyrégne et al. 2017). Furthermore, we find one of the most  
391 deleterious regulatory SNCs in the Netrin receptor *UNC5D*, which is critical for axon guidance  
392 (Takemoto et al. 2011).

393 We also detect changes in genes associated with myelination and synaptic vesicle endocytosis,  
394 critical to sustain a high rate of synaptic transmission, including *DCX* (Yap et al. 2012), *SCAP*  
395 (Verheijen et al. 2009), *RB1CC1* (Menzies et al. 2015), *ADSL* (Jurecka et al. 2012) and *PACSIN1*  
396 (Widagdo et al. 2016) among others (Supplementary Information 2). It is noteworthy that among  
397 traits associated with cognitive functions such as language or theory of mind, the timing of  
398 myelination appears to be a good predictor of computational abilities (Skeide and Friederici 2016;  
399 Grosse Wiesmann et al. 2017). Computational processing might have been facilitated by some of  
400 the changes presented here, at least in some of the circuits that have expanded in our lineage (Mars  
401 et al. 2018), since subtle maturational differences early in development (Dubois et al. 2016) may  
402 have had a considerable impact on the phenotype. In this context, it is worth mentioning that in our  
403 dataset, several genes carrying HHMCs and associated with basal ganglia functions (critical for  
404 language and cognition) stand out, like *SLITRK1* (Abelson et al. 2005) and *NOVA1* (Jelen et al.  
405 2010; Konopka et al. 2012; Alsiö et al. 2013; Zhou et al. 2015; Popovitchenko et al. 2016)  
406 (Supplementary Information 4). Finally, in the broader context of cognition, we find an enrichment  
407 of HHMCs in genes associated to “Alzheimer’s disease (cognitive decline)” and “Cognitive decline  
408 (age-related)”, with seven associated genes (*COX7B2*, *BCAS3*, *DMXL1*, *LIPC*, *PLEKHG1*, *TTL2*  
409 and *VIT*). Among genes influencing behavioral traits (Supplementary Information 4) are *GPR153*  
410 (Sreedharan et al. 2011), *NCOA6* (Takata et al. 2018), or the Adenylosuccinate Lyase (*ADSL*) (Fon

411 et al. 1995), for which the ancestral Neanderthal-like allele has not been observed in 1,000s of  
412 modern human genomes and which has been pointed out before as under positive selection  
413 (Castellano et al. 2014; Racimo et al. 2014; Racimo 2016; Peyrégne et al. 2017) We know that  
414 archaic hominins likely had certain language-like abilities (Dediu and Levinson 2013; Dediu and  
415 Levinson 2018), and hybrids of modern and archaic humans must have survived in their  
416 communities (Fu et al. 2015), underlining the large overall similarity of these populations.  
417 However, genes associated with axon guidance functions, which are important for the refinement of  
418 neural circuits including those relevant for speech and language, are found in introgression deserts  
419 (Jeong et al. 2016; Lei et al. 2017), which seems to be a unidirectional and human-specific pattern  
420 especially in the *FOXP2* region (Kuhlwilm 2018). We suggest that modifications of a complex  
421 network in cognition or learning took place in modern human evolution (Boeckx and Benítez-  
422 Burraco 2014), possibly related to other brain-related (Bastir et al. 2011; Hublin et al. 2015; Boeckx  
423 2017; Bryant and Preuss 2018), vocal tract (Gokhman et al. 2017) or neural changes (Belyk and  
424 Brown 2017).

425

#### 426 **The craniofacial phenotype**

427 In previous work on ancient genomes changes related to craniofacial morphology have been  
428 highlighted (Castellano et al. 2014; Gokhman et al. 2017), and we find an enrichment of genes with  
429 an excess of HF SNCs on the modern human lineage for soft palate development (Table S6).  
430 Among genes harboring an excess of HF SNCs associated with specific facial features, we find  
431 *RUNX2*, *EDAR*, and *GLI3* (Adhikari et al. 2016), *NFATC1* (Kim and Kim 2014), *SPOP* (Cai and  
432 Liu 2016), *DDR2* (Zhang et al. 2011) and *NELL1* (Zhang et al. 2012), possibly carrying changes in  
433 regulatory regions, while mutations in the HHMC-carrying gene encoding for the transcription  
434 factor *ATRX* cause facial dysmorphism (Moncini et al. 2013). In addition, genes with HHMCs such  
435 as *PLXNA2* (Oh et al. 2012), *EVC2* (Kwon et al. 2018), *MEPE* (Gullard et al. 2016), *OMD*  
436 (Tashima et al. 2015), and *SPAG17* (Teves et al. 2015) are known to affect craniofacial bone and  
437 tooth morphologies. These genes appear to be important in determining bone density, mineralization  
438 and remodeling, hence they may underlie differences between archaic and modern human facial  
439 growth (Lacruz et al. 2015). Some of these facial properties may have been present in the earliest  
440 fossils attributed to *H. sapiens*, like the Jebel Irhoud fossils (Hublin et al. 2017), deviating from  
441 craniofacial features which emerged in earlier forms of *Homo* (Lacruz et al. 2013), and may have  
442 become established before some brain-related changes discussed here (Stringer 2016; Neubauer et  
443 al. 2018). The gene encoding the transcription factor *PRDM10* stands out for carrying HHMCs,  
444 being found in selective sweep regions and the second-most interacting protein within the HHMC  
445 dataset. Although little is known about *PRDM10*, it may be related to dendrite growth (Siegel et al.  
446 2002) and neural crest related changes that contributed to the formation of our distinct modern face  
447 (Park and Kim 2010). Other craniofacial morphology-related genes, such as *DCHS2* (Adhikari et al.

448 2016), *HIVEP2* (Jones et al. 2010), *HIVEP3* (Imamura et al. 2014), *FREM1* (Lee et al. 2017), and  
449 *FRAS1* (Talbot et al. 2016) harbor AHMCs, while another bone-related gene, *MEF2C* (Verzi et al.  
450 2007), shows an excess of HF changes on the archaic lineage. These changes may underlie some of  
451 the prominent derived facial traits of Neanderthals (Rak 1986).

452

### 453 **Life history and other phenotypic traits**

454 Apart from their consequences for cognitive functions, it has been suggested that changes  
455 involved in synaptic plasticity might be interpreted in a context of neoteny (Somel et al. 2009; Liu  
456 et al. 2012; Peyrégne et al. 2017; Sherwood and Gómez-Robles 2017), with the implication of  
457 delayed maturation in humans (Bednarik 2013) and a longer timeframe for brain development.  
458 However, given their similar brain sizes (Hofman 1983), humans and Neanderthals might both have  
459 needed a long overall maturation time (Ponce de León et al. 2017; Rosas et al. 2017). Accordingly,  
460 notions like neoteny and heterochrony are unlikely to be fine-grained enough to capture differences  
461 between these populations, but early differences in infant brain growth between humans and  
462 Neanderthals (Gunz et al. 2010; Hublin et al. 2015) could have rendered our maturational profile  
463 distinct during limited developmental periods and within specific brain regions, imposing different  
464 metabolic requirements (Bruner et al. 2014). One of the brain regions where such differences are  
465 found is the orbitofrontal cortex (OFC) (Bastir et al. 2011), and we find that the OFC at infant age  
466 (0-2 years) is enriched for the expression of genes that carry HHMCs compared to synonymous  
467 SNCs. We suggest that the development of the OFC in infants might have been subject to subtle  
468 changes since the split from Neanderthals rather than a general developmental delay, which is  
469 particularly interesting given that this brain region has been implied in social cognition (Beer et al.  
470 2006) and learning (Miller et al. 2018).

471 Genes carrying HHMCs are enriched for expression in the gray matter of the forebrain at the  
472 adolescent age compared to AHMC-carrying genes, hence additional human-specific modifications  
473 during this period might have taken place, possibly linked to changes in myelination described  
474 above. It has been suggested that differences in childhood adolescence time existed between  
475 humans and Neanderthals, after a general developmental delay in the hominin lineage (Smith and  
476 Tompkins 1995; Bock and Sellen 2002). Dental evidence suggests an earlier maturation in  
477 Neanderthals than modern humans (Smith et al. 2010), and it has been claimed that Neanderthals  
478 might have reached adulthood earlier (Ramirez Rozzi and de Castro 2004). Furthermore, an  
479 introgressed indel from Neanderthals causes an earlier onset of menarche in present-day humans  
480 (Chintalapati et al. 2017), supporting at least the existence of alleles for earlier maturation in the  
481 Neanderthal population. Among the genes carrying fixed HHMCs, *NCOA6* has also been linked to  
482 age at menarche and onset of puberty (Day et al. 2017), as well as placental function (Antonson et  
483 al. 2003). This putative transcription factor is enriched in HF changes and has been suggested to  
484 have been under positive selection on the modern human lineage (Racimo et al. 2014; Peyrégne et

485 al. 2017). The HHMC is located nearby and three 5'-UTR variants within a putatively selected  
486 region (Zhou et al. 2015), with an estimated time of selection at around 150 kya (assuming a slow  
487 mutation rate). Even though this gene carries an AHMC as well, it remains possible that modern  
488 humans acquired subtle differences in their reproductive system through lineage-specific changes in  
489 this gene. A delay in reproductive age may influence overall longevity, another trait for which our  
490 data set yields an enrichment of genes with HHMCs (*SLC38A10*, *TBC1D22A* and *ZNF516*).

491 The male reproductive system might have been subject to changes as well, since we find that  
492 several proteins in spermatogenesis seem to carry two HHMCs: Sperm Specific Antigen 2 (*SSFA2*),  
493 Sperm Associated Antigen 17 (*SPAG17*), *ADAM18* (Zhu et al. 1999) and *WDR52* (Tang et al. 2017),  
494 out of which *ADAM18* and *SPAG17* also carry AHMCs. Lineage-specific differences in genes  
495 related to sperm function or spermatogenesis might have been relevant for the genetic compatibility  
496 between humans and Neanderthals. Another gene harboring a HHMC with similar functions is  
497 *EPPIN* (Wang et al. 2005), which shows no HF changes on the archaic, but 27 such SNCs on the  
498 modern human lineage. The gene encoding for the Testis Expressed 2 protein (*TEX2*) is enriched for  
499 HF changes in both humans and archaics, with one HHMC and five AHMCs, but its function is not  
500 yet known. Another possible SNC that might be relevant in this context is a splice site change in  
501 *IZUMO4*, since proteins encoded by the *IZUMO* family form complexes on mammalian sperm  
502 (Ellerman et al. 2009). The adjacent exon is not present in all transcripts of this gene, suggesting a  
503 functional role of this splice site SNC. Finally, genes in the GO category “spermatoproteasome  
504 complex” are enriched for an excess of HF changes on the human lineage.

505 It has been found that Neanderthal alleles contribute to addiction and, possibly, pain sensitivity in  
506 modern humans (Simonti et al. 2016; Dannemann et al. 2017). In this context, an interesting  
507 protein-truncating SNC at high frequency in humans is the loss of a stop codon in the opioid  
508 receptor *OPRM1* (6:154360569), potentially changing the structure of the protein encoded by this  
509 gene in some transcripts. Other mutations in this gene are associated to heroin addiction (Shi et al.  
510 2002), and pain perception (Tan et al. 2009), but also sociality traits (Pearce et al. 2017).  
511 Interestingly, a recent study found a pain insensitivity disorder caused by a mutation in *ZFH2*  
512 (Habib et al. 2017), which carries an AHMC, and three HHMCs are observed in *NPAP1*, which  
513 might be associated with the Prader-Willi syndrome, involving behavioral problems and a high pain  
514 threshold (Buiting et al. 2007). Such changes may point to differences in levels of resilience to pain  
515 between Neanderthals and modern humans.

516

517

## 518 **Conclusion**

519 The long-term evolutionary processes that led to the human condition (Pääbo 2014) is still  
520 subject to debate and investigation, and the high-quality genomes from archaic humans provide  
521 opportunities to explore the recent evolution of our species. We want to contribute to an attempt to

522 unveil the genetic basis of specific molecular events in the time-window after the split from these  
523 archaic populations and before the emergence of most of the present-day diversity. We sought to  
524 combine different sources of information, from genome-wide enrichment analyses to functional  
525 information available for specific genes, to identify threads linking molecular needles in this  
526 expanded haystack. In doing so, we have mainly built on existing proposals concerning brain-  
527 related changes, but we have divided the observations into different biological levels, from cellular  
528 changes through brain organization differences to complex phenotypic traits. Only future  
529 experimental work will determine which of the changes highlighted here contributed significantly to  
530 making us “fully human”. We hope that our characterization and presentation of some new  
531 candidate genes will help prioritize inquiry in this area, since the specific type of validation depends  
532 on each candidate gene or network.

533

534

### 535 **Methods**

536 We used the publicly available high-coverage genotypes for three archaic individuals: One  
537 Denisovan (Meyer et al. 2012), one Neanderthal from the Denisova cave in Altai mountains (Prüfer  
538 et al. 2014), and another Neanderthal from Vindija cave, Croatia (Prüfer et al. 2017). The data is  
539 publicly available under <http://cdna.eva.mpg.de/neandertal/Vindija/VCF/>, with the human genome  
540 version *hg19* as reference, covering ~1.8 billion base pairs of the genome (Prüfer et al. 2017). We  
541 applied further filtering to remove sites with less than 5-fold coverage and more than 105-fold  
542 coverage in the Altai Neanderthal or 75-fold coverage in the other archaic individuals, if such cases  
543 occurred. We also removed sites with genotype quality smaller than 20, and heterozygous sites with  
544 strong allele imbalance (<0.2 minor allele frequency). Although these permissive filters increase  
545 power compared to previous studies, we caution that in some cases genotypes might be incorrect.  
546 We added the genotype and coverage for the exome and chromosome 21 sequences of the Vindija  
547 and El Sidrón Neanderthals from previous studies (Castellano et al. 2014; Kuhlwilm et al. 2016),  
548 with 75-fold and 50-fold coverage cutoffs, respectively. These studies provided data for the same  
549 Vindija individual (Prüfer et al. 2017).

550 We applied the Ensembl Variant Effect Predictor VEP (McLaren et al. 2016) in order to obtain  
551 inferences for protein-coding and regulatory mutations, scores for SIFT (Kumar et al. 2009),  
552 PolyPhen (Adzhubei et al. 2010), CADD (Kircher et al. 2014) and GWAVA (G.R.S. Ritchie et al.  
553 2014), and allele frequencies in the 1000 Genomes and ExAC human variation databases (Auton et  
554 al. 2015; Lek et al. 2016). We used the inferred ancestral allele from published data on multiple  
555 genome alignments (Paten et al. 2008), and at positions where this information was not available,  
556 the macaque reference allele, *rheMac3* (Yan et al. 2011). We determined the allele frequencies in  
557 present-day humans using the dbSNP database build 147 (Sherry et al. 2001). We retrieved the



558 counts for each allele type, and summarized the counts of non-reference alleles at each position.  
559 Grantham scores (Grantham 1974) were calculated for missense mutations.

560 Data processing and database retrieval was performed using bcftools/samtools v1.0 (Li 2011),  
561 bedtools v2.16.2 (Quinlan and Hall 2010), and R/Bioconductor (Huber et al. 2015), with rtracklayer  
562 (Lawrence et al. 2009) and biomaRt (Durinck et al. 2005) packages, and plotting with Rcirco  
563 (Zhang et al. 2013). We analyzed all positions where at least two alleles (human reference and  
564 alternative allele) were observed among the human reference and at least one out of three of the  
565 high-coverage archaic individuals, in at least one archaic chromosome. The 22 autosomal  
566 chromosomes and the X chromosome were analyzed, in the absence of Y chromosome data for the  
567 three female archaic individuals. The data for 4,409,518 segregating sites is available under  
568 [http:tbid.database]. The following subsets were created:

569 Fixed differences: Positions where all present-day humans carry a derived allele, while at least  
570 two out of three archaics carry the ancestral allele, accounting for potential human gene flow into  
571 Neanderthals.

572 High-frequency (HF) differences: Positions where more than 90% of present-day humans carry a  
573 derived allele, while at least the Denisovan and one Neanderthal carry the ancestral allele,  
574 accounting for different types of errors and bi-directional gene flow.

575 Extended high-frequency differences: Positions where more than 90% of present-day humans  
576 carry a derived allele, while one of the following conditions is true: a) Not all archaics have reliable  
577 genotypes, but those that have carry the ancestral allele. b) Some archaics carry an alternative  
578 genotype that is not identical to either the human or the ancestral allele. c) The Denisovan carries  
579 the ancestral allele, while one Neanderthal carries a derived allele, which allows for gene flow from  
580 humans into Neanderthals. d) The ancestral allele is missing in the EPO alignment, but the macaque  
581 reference sequence is identical to the allele in all three archaics.

582 We also created corresponding lists of archaic-specific changes. Fixed changes were defined as  
583 sites where the three archaics carry the derived allele, while humans carry the ancestral allele at  
584 more than 99.999%. High-frequency changes occur to less than 1% in present-day humans, while at  
585 least two archaic individuals carry the derived allele. An extended list presents high-frequency  
586 changes where the ancestral allele is unknown, but the macaque allele is identical to the present-day  
587 human allele.

588 A ranking of mutation density was performed for genes with protein-coding sequences and their  
589 genomic regions as retrieved from Ensembl. For each gene, unique associated changes as predicted  
590 by VEP were counted. A ranking on the number of HF changes per gene length was performed for  
591 all genes that span at least 5,000 bp in the genome and carry at least 25 segregating sites in the  
592 dataset (at any frequency in humans or in archaics), in order to remove genes which are very short  
593 or poor in mutations. The top 5% of the empirical distribution was defined as putatively enriched  
594 for changes on each lineage. The ratio of lineage-specific HF changes was calculated for the subset

595 of genes where at least 20 lineage-specific HF changes were observed on the human and the archaic  
596 lineages combined. The top 10% of the empirical distribution was defined as putatively enriched for  
597 lineage-specific changes.

598 We performed enrichment tests using the R packages ABAEnrichment (Grote et al. 2016) and  
599 DescTools (Signorell 2017). We used the NHGRI-EBI GWAS Catalog (MacArthur et al. 2017), and  
600 overlapped the associated genes with protein-coding changes on the human and archaic lineages,  
601 respectively. We counted the number of HF missense changes on each lineage and the subset of  
602 those associated to each trait (“Disease trait”), and performed a significance test (G-test) against the  
603 number of genes associated to each trait, and all genes in the genome, with a P value cutoff at 0.1.  
604 This suggests a genome-wide enrichment of changes for each trait. We then performed a G-test  
605 between the numbers of HF missense changes on each lineage, and the subset of each associated to  
606 each trait (P-value cutoff at 0.1), to determine a difference between the two lineages. We then  
607 performed an empirical test by creating 1,000 random sets of genes with similar length as the genes  
608 associated to each trait, and counting the overlap to the lineage-specific missense changes. At least  
609 90% of these 1,000 random sets were required to contain fewer missense changes than the real set  
610 of associated genes. Only traits were considered for which at least 10 associated loci were  
611 annotated.

612 Gene Ontology (GO) enrichment was performed using the software FUNC (Prüfer et al. 2007),  
613 with a significance cutoff of the adjusted p-value  $< 0.05$  and a family-wise error rate  $< 0.05$ . When  
614 testing missense changes, a background set of synonymous changes on the same lineage was used  
615 for the hypergeometric test. When testing genes with relative mutation enrichment, the Wilcoxon  
616 rank test was applied. Enrichment for sequence-specific DNA-binding RNA polymerase II  
617 transcription factors and transcription factor candidate genes from (Chawla et al. 2013), and genes  
618 interacting at the centrosome-cilium interface (Gupta et al. 2015) was tested with an empirical test  
619 in which 1,000 random sets of genes were created that matched the length distributions of the genes  
620 in the test list. The same strategy was applied for genes expressed in the developing brain (Table  
621 S10) (Miller et al. 2014). Protein-protein interactions were analyzed using the STRING online  
622 interface v10.5 (Szklarczyk et al. 2017) with standard settings (medium confidence, all sources,  
623 query proteins only) as of January 2018. The overlap with selective sweep screens considers  
624 HHMCs within 50,000 bp of the selected regions (Prüfer et al. 2014; Zhou et al. 2015; Peyrégne et  
625 al. 2017).

626

627 **Figure Legends**

628

629 **Figure 1:** Conceptual summary of this study.

630

631 **Figure 2:** Features discussed in this study. From inside to outside: Genes with HHMCs and  
632 signatures of positive selection (compare Table 2), genes with fixed non-synonymous SNCs on the  
633 human lineage, HHMCs, AHMCs, karyogram of human chromosomes.

634

635

636 **Acknowledgments**

637 We thank S. Han and T. Marques-Bonet for helpful discussions, and A. G. Andirkó and P .T. Martins for  
638 help with figures. M.K. is supported by a Deutsche Forschungsgemeinschaft (DFG) fellowship (KU 3467/1-  
639 1). C.B. acknowledges research funds from the Spanish Ministry of Economy and Competitiveness/FEDER  
640 (grant FFI2016-78034-C2-1-P), Marie Curie International Reintegration Grant from the European Union  
641 (PIRG-GA-2009-256413), research funds from the Fundació Bosch i Gimpera, MEXT/JSPS Grant-in-Aid  
642 for Scientific Research on Innovative Areas 4903 (Evolinguistics: JP17H06379), and Generalitat de  
643 Catalunya (Government of Catalonia) – 2017-SGR-341.

644

645 **Author contributions**

646 M.K. and C.B. analyzed data and wrote the manuscript.

647

648 **Competing interests statement**

649 The authors declare no competing interests.

650

## 651 References

652

- 653 Abelson JF, Kwan KY, O&#039;Roak BJ, Baek DY, Stillman AA, Morgan TM, Mathews CA, Pauls DL, Rašin M-R,  
654 Gunel M, et al. 2005. Sequence Variants in &lt;em>SLITRK1</em>; Are Associated with  
655 Tourette&#039;s Syndrome. *Science* (80- ). [Internet] 310:317 LP-320. Available from:  
656 <http://science.sciencemag.org/content/310/5746/317.abstract>
- 657 Adhikari K, Fuentes-Guajardo M, Quinto-Sánchez M, Mendoza-Revilla J, Camilo Chacón-Duque J, Acuña-Alonso V,  
658 Jaramillo C, Arias W, Lozano RB, Pérez GM, et al. 2016. A genome-wide association scan implicates DCHS2,  
659 RUNX2, GLI3, PAX1 and EDAR in human facial variation. *Nat. Commun.* [Internet] 7:11616. Available from:  
660 <http://dx.doi.org/10.1038/ncomms11616>
- 661 Adzhubei IA, Schmidt S, Peshkin L, Ramensky VE, Gerasimova A, Bork P, Kondrashov AS, Sunyaev SR. 2010. A  
662 method and server for predicting damaging missense mutations. *Nat. Methods* 7:248–249.
- 663 Ahmad FJ, Yu W, McNally FJ, Baas PW. 1999. An Essential Role for Katanin in Severing Microtubules in the Neuron.  
664 *J. Cell Biol.* [Internet] 145:305 LP-315. Available from: <http://jcb.rupress.org/content/145/2/305.abstract>
- 665 Alsö JM, Tarchini B, Cayouette M, Livesey FJ. 2013. Ikaros promotes early-born neuronal fates in the cerebral cortex.  
666 *Proc. Natl. Acad. Sci.* [Internet] 110:E716–E725. Available from:  
667 <http://www.pnas.org/content/110/8/E716.abstract>
- 668 Antonson P, Schuster GU, Wang L, Rozell B, Holter E, Flodby P, Treuter E, Holmgren L, Gustafsson J-Å. 2003.  
669 Inactivation of the Nuclear Receptor Coactivator RAP250 in Mice Results in Placental Vascular Dysfunction.  
670 *Mol. Cell. Biol.* [Internet] 23:1260–1268. Available from: <http://mcb.asm.org/content/23/4/1260.abstract>
- 671 Auton A, Abecasis GR, Altshuler DM, Durbin RM, Bentley DR, Chakravarti A, Clark AG, Donnelly P, Eichler EE,  
672 Flicek P, et al. 2015. A global reference for human genetic variation. *Nature* [Internet] 526:68–74. Available from:  
673 <http://dx.doi.org/10.1038/nature15393>
- 674 Bader JR, Kasuboski JM, Winding M, Vaughan PS, Hinchcliffe EH, Vaughan KT. 2011. Polo-like Kinase1 Is Required  
675 for Recruitment of Dynein to Kinetochores during Mitosis. *J. Biol. Chem.* [Internet] 286:20769–20777. Available  
676 from: <http://www.jbc.org/content/286/23/20769.abstract>
- 677 Bastir M, Rosas A, Gunz P, Peña-Melian A, Manzi G, Harvati K, Kruszynski R, Stringer C, Hublin J-J. 2011. Evolution  
678 of the base of the brain in highly encephalized human species. *Nat. Commun.* [Internet] 2:588. Available from:  
679 <http://dx.doi.org/10.1038/ncomms1593>
- 680 Bednarik GR. 2013. From Human Past to Human Future. *Humanit.* 2.
- 681 Beer JS, John OP, Scabini D, Knight RT. 2006. Orbitofrontal Cortex and Social Behavior: Integrating Self-monitoring  
682 and Emotion-Cognition Interactions. *J. Cogn. Neurosci.* [Internet] 18:871–879. Available from:  
683 <https://doi.org/10.1162/jocn.2006.18.6.871>
- 684 Belyk M, Brown S. 2017. The origins of the vocal brain in humans. *Neurosci. Biobehav. Rev.* [Internet] 77:177–193.  
685 Available from: <http://www.sciencedirect.com/science/article/pii/S0149763416306583>
- 686 Blank MC, Grinberg I, Aryee E, Laliberte C, Chizhikov V V, Henkelman RM, Millen KJ. 2011. Multiple developmental  
687 programs are altered by loss of &lt;em>Zic1</em> and &lt;em>Zic4</em> to cause Dandy-  
688 Walker malformation cerebellar pathogenesis. *Development* [Internet] 138:1207 LP-1216. Available from:  
689 <http://dev.biologists.org/content/138/6/1207.abstract>
- 690 Bock J, Sellen DW. 2002. Childhood and the evolution of the human life course. *Hum. Nat.* [Internet] 13:153–159.  
691 Available from: <https://doi.org/10.1007/s12110-002-1006-5>
- 692 Boeckx C. 2017. The language-ready head: Evolutionary considerations. *Psychon. Bull. Rev.* [Internet] 24:194–199.  
693 Available from: <https://doi.org/10.3758/s13423-016-1087-5>
- 694 Boeckx C, Benítez-Burraco A. 2014. Globularity and language-readiness: generating new predictions by expanding the  
695 set of genes of interest . *Front. Psychol.* [Internet] 5:1324. Available from:  
696 <https://www.frontiersin.org/article/10.3389/fpsyg.2014.01324>
- 697 Bruner E, Jacobs HIL. 2013. Alzheimer’s disease: the downside of a highly evolved parietal lobe? *J. Alzheimers. Dis.*  
698 35:227–240.
- 699 Bruner E, de la Cuétara JM, Masters M, Amano H, Ogihara N. 2014. Functional craniology and brain evolution: from  
700 paleontology to biomedicine. *Front. Neuroanat.* [Internet] 8:19. Available from:  
701 <http://www.ncbi.nlm.nih.gov/pmc/articles/PMC3980103/>
- 702 Bryant KL, Preuss TM. 2018. A Comparative Perspective on the Human Temporal Lobe BT - Digital Endocasts: From  
703 Skulls to Brains. In: Bruner E, Ogihara N, Tanabe HC, editors. Tokyo: Springer Japan. p. 239–258. Available  
704 from: [https://doi.org/10.1007/978-4-431-56582-6\\_16](https://doi.org/10.1007/978-4-431-56582-6_16)
- 705 Bufill E, Agustí J, Blesa R. 2011. Human neoteny revisited: The case of synaptic plasticity. *Am. J. Hum. Biol.* [Internet]  
706 23:729–739. Available from: <http://dx.doi.org/10.1002/ajhb.21225>
- 707 Bufill E, Blesa R, Agustí J. 2013. Alzheimer’s disease: an evolutionary approach. *J. Anthropol. Sci. = Riv. di Antropol.*  
708 *JASS* 91:135–157.
- 709 Buiting K, Nazlican H, Galetzka D, Wawrzik M, Groß S, Horsthemke B. 2007. C15orf2 and a novel noncoding  
710 transcript from the Prader–Willi/Angelman syndrome region show monoallelic expression in fetal brain.  
711 *Genomics* [Internet] 89:588–595. Available from:  
712 <http://www.sciencedirect.com/science/article/pii/S0888754306003703>
- 713 Cai H, Liu A. 2016. Spop promotes skeletal development and homeostasis by positively regulating Ihh signaling. *Proc.*  
714 *Natl. Acad. Sci.* [Internet] 113:14751–14756. Available from: <http://www.pnas.org/content/113/51/14751.abstract>

- 715 Camp JG, Badsha F, Florio M, Kanton S, Gerber T, Wilsch-Bräuninger M, Lewitus E, Sykes A, Hevers W, Lancaster M,  
716 et al. 2015. Human cerebral organoids recapitulate gene expression programs of fetal neocortex development.  
717 Proc. Natl. Acad. Sci. U. S. A. [Internet] 112:15672–15677. Available from:  
718 <http://www.pubmedcentral.nih.gov/articlerender.fcgi?artid=4697386&tool=pmcentrez&rendertype=abstract>
- 719 Camp JG, Treutlein B. 2017. Human organomics: a fresh approach to understanding human development using single-  
720 cell transcriptomics. Development [Internet] 144:1584 LP-1587. Available from: [http://dev.biologists.org/content/  
721 144/9/1584.abstract](http://dev.biologists.org/content/144/9/1584.abstract)
- 722 Castellano S, Parra G, Sánchez-Quinto FA, Racimo F, Kuhlwilm M, Kircher M, Sawyer S, Fu Q, Heinze A, Nickel B, et  
723 al. 2014. Patterns of coding variation in the complete exomes of three Neandertals. Proc. Natl. Acad. Sci. U. S. A.  
724 [Internet] 111:6666–6671. Available from: <http://www.pnas.org/content/111/18/6666>
- 725 Chawla K, Tripathi S, Thommesen L, Lægread A, Kuiper M. 2013. TFcheckpoint: a curated compendium of specific  
726 DNA-binding RNA polymerase II transcription factors. Bioinformatics [Internet] 29:2519–2520. Available from:  
727 <http://dx.doi.org/10.1093/bioinformatics/btt432>
- 728 Chen Y, Huang W-C, Séjourné J, Clipperton-Allen AE, Page DT. 2015. &lt;em>Pten</em> Mutations Alter  
729 Brain Growth Trajectory and Allocation of Cell Types through Elevated  $\beta$ -Catenin Signaling. J. Neurosci.  
730 [Internet] 35:10252 LP-10267. Available from: <http://www.jneurosci.org/content/35/28/10252.abstract>
- 731 Cheng Y-Z, Eley L, Hynes A-M, Overman LM, Simms RJ, Barker A, Dawe HR, Lindsay S, Sayer JA. 2012.  
732 Investigating Embryonic Expression Patterns and Evolution of AHI1 and CEP290 Genes, Implicated in Joubert  
733 Syndrome. PLoS One [Internet] 7:e44975. Available from: <https://doi.org/10.1371/journal.pone.0044975>
- 734 Chintalapati M, Dannemann M, Prüfer K. 2017. Using the Neandertal genome to study the evolution of small insertions  
735 and deletions in modern humans. BMC Evol. Biol. [Internet] 17:179. Available from:  
736 <https://doi.org/10.1186/s12862-017-1018-8>
- 737 Consortium TCS and A. 2005. Initial sequence of the chimpanzee genome and comparison with the human genome.  
738 Nature [Internet] 437:69. Available from: <http://dx.doi.org/10.1038/nature04072>
- 739 Cuberos H, Vallée B, Vourc’h P, Tastet J, Andres CR, Bénédicti H. 2015. Roles of LIM kinases in central nervous  
740 system function and dysfunction. FEBS Lett. [Internet] 589:3795–3806. Available from:  
741 <http://doi.wiley.com/10.1016/j.febslet.2015.10.032>
- 742 Dannemann M, Prüfer K, Kelso J. 2017. Functional implications of Neandertal introgression in modern humans.  
743 Genome Biol. [Internet] 18:61. Available from: <https://doi.org/10.1186/s13059-017-1181-7>
- 744 Day FR, Thompson DJ, Helgason H, Chasman DJ, Finucane H, Sulem P, Ruth KS, Whalen S, Sarkar AK, Albrecht E, et  
745 al. 2017. Genomic analyses identify hundreds of variants associated with age at menarche and support a role for  
746 puberty timing in cancer risk. Nat. Genet. [Internet] 49:834–841. Available from:  
747 <http://www.ncbi.nlm.nih.gov/pubmed/28436984>
- 748 Dediu D, Levinson SC. 2013. On the antiquity of language: The reinterpretation of neandertal linguistic capacities and  
749 its consequences. Front. Psychol. 4:1–17.
- 750 Dediu D, Levinson SC. 2018. Neanderthal language revisited: not only us. Curr. Opin. Behav. Sci. [Internet] 21:49–55.  
751 Available from: <https://www.sciencedirect.com/science/article/pii/S2352154617301754>
- 752 Dennis MY, Nettle X, Sudmant PH, Antonacci F, Graves TA, Nefedov M, Rosenfeld JA, Sajjadian S, Malig M,  
753 Kotkiewicz H, et al. 2012. Evolution of Human-Specific Neural *SRGAP2* Genes by Incomplete  
754 Segmental Duplication. Cell [Internet] 149:912–922. Available from: <https://doi.org/10.1016/j.cell.2012.03.033>
- 755 Dubois J, Poupon C, Thirion B, Simonnet H, Kulikova S, Leroy F, Hertz-Pannier L, Dehaene-Lambertz G. 2016.  
756 Exploring the Early Organization and Maturation of Linguistic Pathways in the Human Infant Brain. Cereb.  
757 Cortex [Internet] 26:2283–2298. Available from: <http://dx.doi.org/10.1093/cercor/bhv082>
- 758 Dumas LJ, O’Bleness MF, Davis JM, Dickens CM, Anderson N, Keeney JG, Jackson J, Sikela M, Raznahan A, Giedd  
759 J, et al. 2012. DUF1220-Domain Copy Number Implicated in Human Brain-Size Pathology and Evolution. Am. J.  
760 Hum. Genet. [Internet] 91:444–454. Available from: <http://www.ncbi.nlm.nih.gov/pmc/articles/PMC3511999/>
- 761 Durinck S, Moreau Y, Kasprzyk A, Davis S, De Moor B, Brazma A, Huber W. 2005. BioMart and Bioconductor: a  
762 powerful link between biological databases and microarray data analysis. Bioinformatics [Internet] 21:3439–  
763 3440. Available from: <http://www.ncbi.nlm.nih.gov/pubmed/16082012>
- 764 Ellerman DA, Pei J, Gupta S, Snell WJ, Myles D, Primakoff P. 2009. Izumo is part of a multiprotein family whose  
765 members form large complexes on mammalian sperm. Mol. Reprod. Dev. [Internet] 76:1188–1199. Available  
766 from: <http://www.ncbi.nlm.nih.gov/pmc/articles/PMC3779078/>
- 767 Enard W, Gehre S, Hammerschmidt K, Hölter SM, Blass T, Somel M, Brückner MK, Schreiweis C, Winter C, Sohr R,  
768 et al. 2009. A Humanized Version of Foxp2 Affects Cortico-Basal Ganglia Circuits in Mice. Cell [Internet]  
769 137:961–971. Available from: <http://linkinghub.elsevier.com/retrieve/pii/S009286740900378X>
- 770 Fietz SA, Huttner WB. 2011. Cortical progenitor expansion, self-renewal and neurogenesis—a polarized perspective.  
771 Curr. Opin. Neurobiol. [Internet] 21:23–35. Available from:  
772 <http://www.sciencedirect.com/science/article/pii/S095943881000187X>
- 773 Florio M, Albert M, Taverna E, Namba T, Brandl H, Lewitus E, Haffner C, Sykes A, Wong FK, Peters J, et al. 2015.  
774 Human-specific gene ARHGAP11B promotes basal progenitor amplification and neocortex expansion. Science  
775 [Internet] 347:1465–1470. Available from: <http://www.ncbi.nlm.nih.gov/pubmed/25721503>
- 776 Fon EA, Sarrazin J, Meunier C, Alarcia J, Shevell MI, Philippe A, Leboyer M, Rouleau GA. 1995. Adenylosuccinate  
777 lyase (ADSL) and infantile autism: Absence of previously reported point mutation. Am. J. Med. Genet. [Internet]  
778 60:554–557. Available from: <http://doi.wiley.com/10.1002/ajmg.1320600614>

- 779 Fu Q, Hajdinjak M, Moldovan OT, Constantin S, Mallick S, Skoglund P, Patterson N, Rohland N, Lazaridis I, Nickel B,  
780 et al. 2015. An early modern human from Romania with a recent Neanderthal ancestor. *Nature* [Internet]  
781 524:216–219. Available from: <http://www.nature.com/nature/journal/v524/n7564/abs/nature14558.html>
- 782 Genin A, Desir J, Lambert N, Biervliet M, Van Der Aa N, Pierquin G, Killian A, Tosi M, Urbina M, Lefort A, et al.  
783 2012. Kinetochore KMN network gene CASC5 mutated in primary microcephaly. *Hum. Mol. Genet.* [Internet]  
784 21:5306–5317. Available from: <http://dx.doi.org/10.1093/hmg/dd5386>
- 785 Giandomenico SL, Lancaster MA. 2017. Probing human brain evolution and development in organoids. *Curr. Opin.*  
786 *Cell Biol.* [Internet] 44:36–43. Available from:  
787 <http://www.sciencedirect.com/science/article/pii/S0955067417300030>
- 788 Gokhman D, Agranat-Tamir L, Housman G, Garcia-Perez R, Nissim-Rafinia M, Mallick S, Nieves-Colón M, Li H,  
789 Alpaslan-Roodenberg S, Novak M, et al. 2017. Extensive Regulatory Changes in Genes Affecting Vocal and  
790 Facial Anatomy Separate Modern from Archaic Humans. *bioRxiv* [Internet]. Available from:  
791 <http://biorxiv.org/content/early/2017/10/03/106955.abstract>
- 792 Grantham R. 1974. Amino Acid Difference Formula to Help Explain Protein Evolution. *Science* (80-. ). 185.
- 793 Gratten J, Visscher PM. 2016. Genetic pleiotropy in complex traits and diseases: implications for genomic medicine.  
794 *Genome Med.* [Internet] 8:78. Available from: <https://doi.org/10.1186/s13073-016-0332-x>
- 795 Green RE, Krause J, Briggs AW, Maricic T, Stenzel U, Kircher M, Patterson N, Li H, Zhai W, Fritz MH-Y, et al. 2010.  
796 A Draft Sequence of the Neandertal Genome. *Science* (80-. ). [Internet] 328:710–722. Available from:  
797 <http://www.sciencemag.org/content/328/5979/710.abstract>
- 798 Grosse Wiesmann C, Schreiber J, Singer T, Steinbeis N, Friederici AD. 2017. White matter maturation is associated  
799 with the emergence of Theory of Mind in early childhood. *Nat. Commun.* [Internet] 8:14692. Available from:  
800 <http://dx.doi.org/10.1038/ncomms14692>
- 801 Grote S, Prüfer K, Kelso J, Dannemann M. 2016. ABAEnrichment: an R package to test for gene set expression  
802 enrichment in the adult and developing human brain. *Bioinformatics* [Internet] 32:3201–3203. Available from:  
803 <http://www.ncbi.nlm.nih.gov/pmc/articles/PMC5048072/>
- 804 Gullard A, Gluhak-Heinrich J, Papagerakis S, Sohn P, Unterbrink A, Chen S, MacDougall M. 2016. MEPE Localization  
805 in the Craniofacial Complex and Function in Tooth Dentin Formation. *J. Histochem. Cytochem.* [Internet]  
806 64:224–236. Available from: <https://doi.org/10.1369/0022155416635569>
- 807 Gunz P, Neubauer S, Golovanova L, Doronichev V, Maureille B, Hublin J-J. 2012. A uniquely modern human pattern of  
808 endocranial development. Insights from a new cranial reconstruction of the Neandertal newborn from  
809 Mezmaiskaya. *J. Hum. Evol.* [Internet] 62:300–313. Available from:  
810 <http://www.sciencedirect.com/science/article/pii/S0047248411002314>
- 811 Gunz P, Neubauer S, Maureille B, Hublin JJ. 2010. Brain development after birth differs between Neandertals and  
812 modern humans. *Curr. Biol.* 20:921–922.
- 813 Gupta GD, Coyaud É, Gonçalves J, Mojarad BA, Liu Y, Wu Q, Gheiratmand L, Comartin D, Tkach JM, Cheung SWT,  
814 et al. 2015. A Dynamic Protein Interaction Landscape of the Human Centrosome–Cilium Interface. *Cell* [Internet]  
815 163:1484–1499. Available from: <http://dx.doi.org/10.1016/j.cell.2015.10.065>
- 816 Habib AM, Matsuyama A, Okorokov AL, Santana-Varela S, Bras JT, Aloisi AM, Emery EC, Bogdanov YD, Follenfant  
817 M, Gossage SJ, et al. 2017. A novel human pain insensitivity disorder caused by a point mutation in ZFH2.  
818 *Brain* [Internet]:awx326-awx326. Available from: <http://dx.doi.org/10.1093/brain/awx326>
- 819 Hoffmann DL, Angelucci DE, Villaverde V, Zapata J, Zilhão J. 2018. Symbolic use of marine shells and mineral  
820 pigments by Iberian Neandertals 115,000 years ago. *Sci. Adv.* [Internet] 4. Available from:  
821 <http://advances.sciencemag.org/content/4/2/eaar5255.abstract>
- 822 Hofman M a. 1983. Encephalization in hominids: evidence for the model of punctuationalism. *Brain. Behav. Evol.*
- 823 Hoshino J, Aruga J, Ishiguro A, Mikoshiba K. 2003. *Dorz1*, a novel gene expressed in differentiating cerebellar granule  
824 neurons, is down-regulated in *Zic1*-deficient mouse. *Mol. Brain Res.* [Internet] 120:57–64. Available from: <http://www.sciencedirect.com/science/article/pii/S0169328X03004467>
- 825
- 826 Huber W, Carey VJ, Gentleman R, Anders S, Carlson M, Carvalho BS, Bravo HC, Davis S, Gatto L, Girke T, et al.  
827 2015. Orchestrating high-throughput genomic analysis with Bioconductor. *Nat Meth* [Internet] 12:115–121.  
828 Available from: <http://dx.doi.org/10.1038/nmeth.3252>
- 829 Hublin J-J, Ben-Ncer A, Bailey SE, Freidline SE, Neubauer S, Skinner MM, Bergmann I, Le Cabec A, Benazzi S,  
830 Harvati K, et al. 2017. New fossils from Jebel Irhoud, Morocco and the pan-African origin of *Homo sapiens*.  
831 *Nature* [Internet] 546:289. Available from: <http://dx.doi.org/10.1038/nature22336>
- 832 Hublin J-J, Neubauer S, Gunz P. 2015. Brain ontogeny and life history in Pleistocene hominins. *Philos. Trans. R. Soc. B*  
833 *Biol. Sci.* [Internet] 370. Available from:  
834 <http://rsta.royalsocietypublishing.org/content/370/1663/20140062.abstract>
- 835 Imamura K, Maeda S, Kawamura I, Matsuyama K, Shinohara N, Yahiro Y, Nagano S, Setoguchi T, Yokouchi M,  
836 Ishidou Y, et al. 2014. Human Immunodeficiency Virus Type 1 Enhancer-binding Protein 3 Is Essential for the  
837 Expression of Asparagine-linked Glycosylation 2 in the Regulation of Osteoblast and Chondrocyte  
838 Differentiation. *J. Biol. Chem.* [Internet] 289:9865–9879. Available from:  
839 <http://www.jbc.org/content/289/14/9865.abstract>
- 840 Jamsheer A, Sowińska A, Trzeciak T, Jamsheer-Bratkowska M, Geppert A, Latos-Bieleńska A. 2012. Expanded  
841 mutational spectrum of the *GLI3* gene substantiates genotype–phenotype correlations. *J. Appl. Genet.* [Internet]  
842 53:415–422. Available from: <https://doi.org/10.1007/s13353-012-0109-x>
- 843 Jelen N, Ule J, Živin M. 2010. Cholinergic regulation of striatal Nova mRNAs. *Neuroscience* [Internet] 169:619–627.  
844 Available from: <http://www.sciencedirect.com/science/article/pii/S0306452210007128>

- 845 Jensen KB, Dredge BK, Stefani G, Zhong R, Buckanovich RJ, Okano HJ, Yang YYL, Darnell RB. 2000. Nova-1  
846 Regulates Neuron-Specific Alternative Splicing and Is Essential for Neuronal Viability. *Neuron* [Internet] 25:359–  
847 371. Available from: [http://dx.doi.org/10.1016/S0896-6273\(00\)80900-9](http://dx.doi.org/10.1016/S0896-6273(00)80900-9)
- 848 Jeong J-W, Sundaram S, Behen ME, Chugani HT. 2016. Relationship between genotype and arcuate fasciculus  
849 morphology in six young children with global developmental delay: Preliminary DTI study. *J. Magn. Reson.*  
850 *Imaging* [Internet] 44:1504–1512. Available from: <http://doi.wiley.com/10.1002/jmri.25306>
- 851 Jones DC, Schweitzer MN, Wein M, Sigrist K, Takagi T, Ishii S, Glimcher LH. 2010. Uncoupling of growth plate  
852 maturation and bone formation in mice lacking both *Schnurri-2* and *Schnurri-3*. *Proc. Natl. Acad. Sci.* [Internet]  
853 107:8254–8258. Available from: <http://www.pnas.org/content/107/18/8254.abstract>
- 854 Ju X-C, Hou Q-Q, Sheng A-L, Wu K-Y, Zhou Y, Jin Y, Wen T, Yang Z, Wang X, Luo Z-G. 2016. The hominoid-specific  
855 gene *TBC1D3* promotes generation of basal neural progenitors and induces cortical folding in mice. *Gleeson JG,*  
856 *editor. Elife* [Internet] 5:e18197. Available from: <https://doi.org/10.7554/eLife.18197>
- 857 Jurecka A, Jurkiewicz E, Tylki-Szymanska A. 2012. Magnetic resonance imaging of the brain in adenylosuccinate lyase  
858 deficiency: a report of seven cases and a review of the literature. *Eur. J. Pediatr.* [Internet] 171:131–138. Available  
859 from: <https://doi.org/10.1007/s00431-011-1503-9>
- 860 Karabay A, Yu W, Solowska JM, Baird DH, Baas PW. 2004. Axonal Growth Is Sensitive to the Levels of Katanin, a  
861 Protein That Severs Microtubules. *J. Neurosci.* [Internet] 24:5778 LP-5788. Available from:  
862 <http://www.jneurosci.org/content/24/25/5778.abstract>
- 863 Kevenaer JT, Bianchi S, van Spronsen M, Olieric N, Lipka J, Frias CP, Mikhaylova M, Harterink M, Keijzer N, Wulf  
864 PS, et al. 2017. Kinesin-Binding Protein Controls Microtubule Dynamics and Cargo Trafficking by Regulating  
865 Kinesin Motor Activity. *Curr. Biol.* [Internet] 26:849–861. Available from:  
866 <http://dx.doi.org/10.1016/j.cub.2016.01.048>
- 867 Kim JH, Kim N. 2014. Regulation of NFATc1 in Osteoclast Differentiation. *J Bone Metab* [Internet] 21:233–241.  
868 Available from: <http://synapse.koreamed.org/DOIx.php?id=10.11005%2Fjbm.2014.21.4.233>
- 869 Kircher M, Witten DM, Jain P, O’Roak BJ, Cooper GM, Shendure J. 2014. A general framework for estimating the  
870 relative pathogenicity of human genetic variants. *Nat Genet* [Internet] 46:310–315. Available from:  
871 <https://doi.org/10.1038/ng.2892>
- 872 Kochiyama T, Ogihara N, Tanabe HC, Kondo O, Amano H, Hasegawa K, Suzuki H, Ponce de León MS, Zollikofer  
873 CPE, Bastir M, et al. 2018. Reconstructing the Neanderthal brain using computational anatomy. *Sci. Rep.*  
874 [Internet] 8:6296. Available from: <https://doi.org/10.1038/s41598-018-24331-0>
- 875 Konopka G, Friedrich T, Davis-Turak J, Winden K, Oldham MC, Gao F, Chen L, Wang G-Z, Luo R, Preuss TM, et al.  
876 2012. Human-Specific Transcriptional Networks in the Brain. *Neuron* [Internet] 75:601–617. Available from:  
877 <http://dx.doi.org/10.1016/j.neuron.2012.05.034>
- 878 Koser DE, Thompson AJ, Foster SK, Dwivedy A, Pillai EK, Sheridan GK, Svoboda H, Viana M, Costa L da F, Guck J,  
879 et al. 2016. Mechanosensing is critical for axon growth in the developing brain. *Nat. Neurosci.* [Internet] 19:1592.  
880 Available from: <http://dx.doi.org/10.1038/nn.4394>
- 881 Kuhlwilm M. 2018. The evolution of FOXP2 in the light of admixture. *Curr. Opin. Behav. Sci.* 21.
- 882 Kuhlwilm M, Gronau I, Hubisz MJM, Filippo C de, Prado-Martinez J, Kircher M, Fu Q, Burbano HAHA, Lalueza-  
883 Fox C, Rasilla M de la, et al. 2016. Ancient gene flow from early modern humans into Eastern Neanderthals.  
884 *Nature* [Internet] 530:429–433. Available from: <http://www.nature.com/doi/10.1038/nature16544>
- 885 Kumar P, Henikoff S, Ng PC. 2009. Predicting the effects of coding non-synonymous variants on protein function using  
886 the SIFT algorithm. *Nat. Protoc.* 4:1073–1081.
- 887 Kuwahara A, Sakai H, Xu Y, Itoh Y, Hirabayashi Y, Gotoh Y. 2014. Tcf3 Represses Wnt– $\beta$ -Catenin Signaling and  
888 Maintains Neural Stem Cell Population during Neocortical Development. *PLoS One* [Internet] 9:e94408.  
889 Available from: <https://doi.org/10.1371/journal.pone.0094408>
- 890 Kwon EK, Louie K, Kulkarni A, Yatabe M, Ruellas AC de O, Snider TN, Mochida Y, Cevitanes LHS, Mishina Y,  
891 Zhang H. 2018. The Role of Ellis-Van Creveld 2 (*EVC2*) in Mice During Cranial Bone Development. *Anat. Rec.*  
892 [Internet] 301:46–55. Available from: <http://doi.wiley.com/10.1002/ar.23692>
- 893 Lacruz RS, Bromage TG, O’Higgins P, Arsuaga J-L, Stringer C, Godinho RM, Warshaw J, Martínez I, Gracia-Tellez A,  
894 de Castro JMB, et al. 2015. Ontogeny of the maxilla in Neanderthals and their ancestors. *Nat. Commun.* [Internet]  
895 6:8996. Available from: <http://dx.doi.org/10.1038/ncomms9996>
- 896 Lacruz RS, de Castro JMB, Martínón-Torres M, O’Higgins P, Paine ML, Carbonell E, Arsuaga JL, Bromage TG. 2013.  
897 Facial Morphogenesis of the Earliest Europeans. *PLoS One* [Internet] 8:e65199. Available from:  
898 <https://doi.org/10.1371/journal.pone.0065199>
- 899 Langergraber KE, Prüfer K, Rowney C, Boesch C, Crockford C, Fawcett K, Inoue E, Inoue-Muruyama M, Mitani JC,  
900 Muller MN, et al. 2012. Generation times in wild chimpanzees and gorillas suggest earlier divergence times in  
901 great ape and human evolution. *Proc. ...* [Internet] 109:15716–15721. Available from:  
902 <http://www.pnas.org/content/early/2012/08/08/1211740109.short>
- 903 Lawrence M, Gentleman R, Carey V. 2009. rtracklayer: an R package for interfacing with genome browsers.  
904 *Bioinformatics* [Internet] 25:1841–1842. Available from: [https://academic.oup.com/bioinformatics/article-lookup/](https://academic.oup.com/bioinformatics/article-lookup/doi/10.1093/bioinformatics/btp328)  
905 <doi/10.1093/bioinformatics/btp328>
- 906 Lee MK, Shaffer JR, Leslie EJ, Orlova E, Carlson JC, Feingold E, Marazita ML, Weinberg SM. 2017. Genome-wide  
907 association study of facial morphology reveals novel associations with *FREM1* and *PARK2*. *PLoS One* [Internet]  
908 12:e0176566. Available from: <https://doi.org/10.1371/journal.pone.0176566>

- 909 Lei H, Yan Z, Sun X, Zhang Y, Wang J, Ma C, Xu Q, Wang R, Jarvis ED, Sun Z. 2017. Axon guidance pathways served  
910 as common targets for human speech/language evolution and related disorders. *Brain Lang.* [Internet] 174:1–8.  
911 Available from: <http://www.sciencedirect.com/science/article/pii/S0093934X16301869>
- 912 Lek M, Karczewski KJ, Minikel E V, Samocha KE, Banks E, Fennell T, O’Donnell-Luria AH, Ware JS, Hill AJ,  
913 Cummings BB, et al. 2016. Analysis of protein-coding genetic variation in 60,706 humans. *Nature* [Internet]  
914 536:285–291. Available from: <http://dx.doi.org/10.1038/nature19057>
- 915 Li F-F, Wang X-D, Zhu M-W, Lou Z-H, Zhang Q, Zhu C-Y, Feng H-L, Lin Z-G, Liu S-L. 2015. Identification of two  
916 novel critical mutations in PCNT gene resulting in microcephalic osteodysplastic primordial dwarfism type II  
917 associated with multiple intracranial aneurysms. *Metab. Brain Dis.* [Internet] 30:1387–1394. Available from:  
918 <https://doi.org/10.1007/s11011-015-9712-y>
- 919 Li H. 2011. A statistical framework for SNP calling, mutation discovery, association mapping and population genetical  
920 parameter estimation from sequencing data. *Bioinformatics* [Internet] 27:2987–2993. Available from:  
921 <http://www.ncbi.nlm.nih.gov/pmc/articles/PMC3198575/>
- 922 Li Y, Muffat J, Omer A, Bosch I, Lancaster MA, Sur M, Gehrke L, Knoblich JA, Jaenisch R. 2017. Induction of  
923 Expansion and Folding in Human Cerebral Organoids. *Cell Stem Cell* [Internet] 20:385–396.e3. Available from:  
924 <http://dx.doi.org/10.1016/j.stem.2016.11.017>
- 925 Liu X, Somel M, Tang L, Yan Z, Jiang X, Guo S, Yuan Y, He L, Oleksiak A, Zhang Y, et al. 2012. Extension of cortical  
926 synaptic development distinguishes humans from chimpanzees and macaques. *Genome Res.* [Internet] 22:611–  
927 622. Available from: <http://www.ncbi.nlm.nih.gov/pmc/articles/PMC3317144/>
- 928 Lüders J. 2016. *The Microtubule Cytoskeleton.* (Lüders J, editor.). Vienna: Springer Vienna Available from:  
929 <http://link.springer.com/10.1007/978-3-7091-1903-7>
- 930 MacArthur J, Bowler E, Cerezo M, Gil L, Hall P, Hastings E, Junkins H, McMahon A, Milano A, Morales J, et al. 2017.  
931 The new NHGRI-EBI Catalog of published genome-wide association studies (GWAS Catalog). *Nucleic Acids*  
932 *Res.* [Internet] 45:D896–D901. Available from: <http://www.ncbi.nlm.nih.gov/pmc/articles/PMC5210590/>
- 933 Mars RB, Eichert N, Jbabdi S, Verhagen L, Rushworth MFS. 2018. Connectivity and the search for specializations in  
934 the language-capable brain. *Curr. Opin. Behav. Sci.* [Internet] 21:19–26. Available from:  
935 <https://www.sciencedirect.com/science/article/pii/S235215461730181X>
- 936 McCoy RC, Wakefield J, Akey JM. 2017. Impacts of Neanderthal-Introgressed Sequences on the Landscape of Human  
937 Gene Expression. *Cell* [Internet] 168:916–927.e12. Available from: <http://dx.doi.org/10.1016/j.cell.2017.01.038>
- 938 McLaren W, Gil L, Hunt SE, Riat HS, Ritchie GRS, Thormann A, Flicek P, Cunningham F. 2016. The Ensembl Variant  
939 Effect Predictor. *Genome Biol.* [Internet] 17:122. Available from: <https://doi.org/10.1186/s13059-016-0974-4>
- 940 McLean CY, Reno PL, Pollen AA, Bassan AI, Capellini TD, Guenther C, Indjeian VB, Lim X, Menke DB, Schaar BT,  
941 et al. 2011. Human-specific loss of regulatory DNA and the evolution of human-specific traits. *Nature* [Internet]  
942 471:216–219. Available from: <http://www.nature.com/doi/10.1038/nature09774>
- 943 McVicker DP, Awe AM, Richters KE, Wilson RL, Cowdrey DA, Hu X, Chapman ER, Dent EW. 2016. Transport of a  
944 kinesin-cargo pair along microtubules into dendritic spines undergoing synaptic plasticity. *Nat. Commun.*  
945 [Internet] 7:12741. Available from: <http://dx.doi.org/10.1038/ncomms12741>
- 946 Megraw TL, Sharkey JT, Nowakowski RS. 2011. Cdk5rap2 exposes the centrosomal root of microcephaly syndromes.  
947 *Trends Cell Biol.* [Internet] 21:470–480. Available from: <http://dx.doi.org/10.1016/j.tcb.2011.04.007>
- 948 Menzies FM, Fleming A, Rubinsztein DC. 2015. Compromised autophagy and neurodegenerative diseases. *Nat. Rev.*  
949 *Neurosci.* [Internet] 16:345. Available from: <http://dx.doi.org/10.1038/nrn3961>
- 950 Meyer M, Kircher M, Gansauge M-T, Li H, Racimo F, Mallick S, Schraiber JG, Jay F, Prüfer K, de Filippo C, et al.  
951 2012. a High Coverage Genome Sequence From an Archaic Denisovan Individual. *Science* 338:222–226.
- 952 Miller JA, Ding S-L, Sunkin SM, Smith KA, Ng L, Szafer A, Ebbert A, Riley ZL, Aiona K, Arnold JM, et al. 2014.  
953 Transcriptional Landscape of the Prenatal Human Brain. *Nature* [Internet] 508:199–206. Available from:  
954 <http://dx.doi.org/10.1038/nature13185>
- 955 Miller KJ, Botvinick MM, Brody CD. 2018. Value Representations in Orbitofrontal Cortex Drive Learning, but not  
956 Choice. *bioRxiv* [Internet]. Available from: <http://biorxiv.org/content/early/2018/01/10/245720.1.abstract>
- 957 Mirzaa GM, Parry DA, Fry AE, Giamanco KA, Schwartzentruber J, Vanstone M, Logan C V, Roberts N, Johnson CA,  
958 Singh S, et al. 2014. De novo CCND2 mutations leading to stabilization of cyclin D2 cause megalencephaly-  
959 polymicrogyria-polydactyly-hydrocephalus syndrome. *Nat. Genet.* [Internet] 46:510. Available from:  
960 <http://dx.doi.org/10.1038/ng.2948>
- 961 Moncini S, Bedeschi MF, Castronovo P, Crippa M, Calvello M, Garghentino RR, Scuvera G, Finelli P, Venturin M.  
962 2013. ATRX mutation in two adult brothers with non-specific moderate intellectual disability identified by exome  
963 sequencing. *Meta Gene* [Internet] 1:102–108. Available from:  
964 <http://www.sciencedirect.com/science/article/pii/S2214540013000066>
- 965 Montgomery SH, Capellini I, Venditti C, Barton RA, Mundy NI. 2011. Adaptive Evolution of Four Microcephaly Genes  
966 and the Evolution of Brain Size in Anthropoid Primates. *Mol. Biol. Evol.* [Internet] 28:625–638. Available from:  
967 <http://dx.doi.org/10.1093/molbev/msq237>
- 968 Neubauer S, Hublin J-J, Gunz P. 2018. The evolution of modern human brain shape. *Sci. Adv.* [Internet] 4. Available  
969 from: <http://advances.sciencemag.org/content/4/1/eaao5961.abstract>
- 970 O’Bleness M, Searles VB, Varki A, Gagneux P, Sikela JM. 2012. Evolution of genetic and genomic features unique to  
971 the human lineage. *Nat. Rev. Genet.* [Internet] 13:853–866. Available from:  
972 <http://eutils.ncbi.nlm.nih.gov/entrez/eutils/elink.fcgi?dbfrom=pubmed&id=23154808&retmode=ref&cmd=prlinks>  
973 %5Cnpapers3://publication/doi/10.1038/nrg3336



- 974 O'Regan L, Fry AM. 2009. The Nek6 and Nek7 Protein Kinases Are Required for Robust Mitotic Spindle Formation  
975 and Cytokinesis. *Mol. Cell. Biol.* [Internet] 29:3975–3990. Available from:  
976 <http://mcb.asm.org/content/29/14/3975.abstract>
- 977 Oh J-E, Kim HJ, Kim W-S, Lee ZH, Ryoo H-M, Hwang SJ, Lee Y, Kim H-H. 2012. PlexinA2 mediates osteoblast  
978 differentiation via regulation of Runx2. *J. Bone Miner. Res.* [Internet] 27:552–562. Available from:  
979 <http://doi.wiley.com/10.1002/jbmr.1471>
- 980 Pääbo S. 2014. The Human Condition—A Molecular Approach. *Cell* [Internet] 157:216–226. Available from:  
981 <http://www.sciencedirect.com/science/article/pii/S009286741301605X>
- 982 Park J-A, Kim KC. 2010. Expression patterns of PRDM10 during mouse embryonic development. *BMB Rep.* 43:29–  
983 33.
- 984 Paten B, Herrero J, Fitzgerald S, Beal K, Flicek P, Holmes I, Birney E. 2008. Genome-wide nucleotide-level  
985 mammalian ancestor reconstruction. *Genome Res.* 18:1829–1843.
- 986 Pearce E, Wlodarski R, Machin A, Dunbar RIM. 2017. Variation in the  $\beta$ -endorphin, oxytocin, and dopamine receptor  
987 genes is associated with different dimensions of human sociality. *Proc. Natl. Acad. Sci.* [Internet] 114:5300 LP-  
988 5305. Available from: <http://www.pnas.org/content/114/20/5300.abstract>
- 989 Peyrégne S, Boyle MJ, Dannemann M, Prüfer K. 2017. Detecting ancient positive selection in humans using extended  
990 lineage sorting. *Genome Res.* [Internet] 27:1563–1572. Available from:  
991 <http://genome.cshlp.org/content/27/9/1563.abstract>
- 992 Pfenning AR, Hara E, Whitney O, Rivas M V, Wang R, Roulhac PL, Howard JT, Wirthlin M, Lovell P V, Ganapathy G,  
993 et al. 2014. Convergent transcriptional specializations in the brains of humans and song-learning birds. *Science*  
994 (80- ). [Internet] 346. Available from: <http://science.sciencemag.org/content/346/6215/1256846.abstract>
- 995 Ponce de León MS, Bienvenu T, Akazawa T, Zollikofer CPE. 2017. Brain development is similar in Neanderthals and  
996 modern humans. *Curr. Biol.* [Internet] 26:R665–R666. Available from:  
997 <http://dx.doi.org/10.1016/j.cub.2016.06.022>
- 998 Popovitchenko T, Thompson K, Viljetic B, Jiao X, Kontonyiannis DL, Kiledjian M, Hart RP, Rasin MR. 2016. The  
999 RNA binding protein HuR determines the differential translation of autism-associated FoxP subfamily members  
1000 in the developing neocortex. *Sci. Rep.* [Internet] 6:28998. Available from: <http://dx.doi.org/10.1038/srep28998>
- 1001 Prüfer K, de Filippo C, Grote S, Mafessoni F, Korlević P, Hajdinjak M, Vernot B, Skov L, Hsieh P, Peyrégne S, et al.  
1002 2017. A high-coverage Neandertal genome from Vindija Cave in Croatia. *Science* (80- ). [Internet]. Available  
1003 from: <http://science.sciencemag.org/content/early/2017/10/04/science.aao1887.abstract>
- 1004 Prüfer K, Muetzel B, Do H-HH, Weiss G, Khaitovich P, Rahm E, Pääbo S, Lachmann M, Enard W, Paabo S, et al. 2007.  
1005 FUNC: a package for detecting significant associations between gene sets and ontological annotations. *BMC*  
1006 *Bioinformatics* [Internet] 8:41. Available from: <https://doi.org/10.1186/1471-2105-8-41>
- 1007 Prüfer K, Racimo F, Patterson N, Jay F, Sankararaman S, Sawyer S, Heinze A, Renaud G, Sudmant PHPH, de Filippo  
1008 C, et al. 2014. The complete genome sequence of a Neanderthal from the Altai Mountains. *Nature* [Internet]  
1009 505:43–49. Available from: <http://europemc.org/abstract/med/24352235>
- 1010 Puga A, Xia Y, Elferink C. 2002. Role of the aryl hydrocarbon receptor in cell cycle regulation. *Chem. Biol. Interact.*  
1011 [Internet] 141:117–130. Available from: <http://www.sciencedirect.com/science/article/pii/S0009279702000698>
- 1012 Quinlan AR, Hall IM. 2010. BEDTools: a flexible suite of utilities for comparing genomic features. *Bioinformatics*  
1013 [Internet] 26:841–842. Available from: <https://academic.oup.com/bioinformatics/article-lookup/doi/10.1093/bioinformatics/btq033>
- 1014 Rabett RJ. 2018. The success of failed *Homo sapiens* dispersals out of Africa and into Asia. *Nat. Ecol. Evol.* [Internet]  
1015 2:212–219. Available from: <https://doi.org/10.1038/s41559-017-0436-8>
- 1016 Racimo F. 2016. Testing for Ancient Selection Using Cross-population Allele Frequency Differentiation. *Genetics*  
1017 [Internet] 202:733 LP-750. Available from: <http://www.genetics.org/content/202/2/733.abstract>
- 1018 Racimo F, Kuhlwil M, Slatkin M. 2014. A test for ancient selective sweeps and an application to candidate sites in  
1019 modern humans. *Mol. Biol. Evol.* [Internet] 31:3344–3358. Available from:  
1020 <http://europemc.org/abstract/med/25172957>
- 1021 Rak Y. 1986. The Neanderthal: A new look at an old face. *J. Hum. Evol.* [Internet] 15:151–164. Available from:  
1022 <http://www.sciencedirect.com/science/article/pii/S0047248486800422>
- 1023 Ramirez Rozzi F V, de Castro JM. 2004. surprisingly rapid growth in Neanderthals. *Nature* [Internet] 428. Available  
1024 from: <https://doi.org/10.1038/nature02428>
- 1025 Ratti A, Fallini C, Colombrita C, Pascale A, Laforenza U, Quattrone A, Silani V. 2008. Post-transcriptional regulation of  
1026 neuro-oncological ventral antigen 1 by the neuronal RNA-binding proteins ELAV. *J. Biol. Chem.* [Internet].  
1027 Available from: <http://www.jbc.org/content/early/2008/01/24/jbc.M706082200.short>
- 1028 Ritchie GRS, Dunham I, Zeggini E, Flicek P. 2014. Functional annotation of noncoding sequence variants. *Nat.*  
1029 *Methods* [Internet] 11:294–296. Available from: <http://www.ncbi.nlm.nih.gov/pubmed/24487584>
- 1030 Ritchie K, Watson LA, Davidson B, Jiang Y, Bérubé NG. 2014. ATRX is required for maintenance of the  
1031 neuroprogenitor cell pool in the embryonic mouse brain. *Biol. Open* [Internet] 3:1158 LP-1163. Available from:  
1032 <http://bio.biologists.org/content/3/12/1158.abstract>
- 1033 Rosas A, Ríos L, Estalrich A, Liversidge H, García-Taberner A, Huguet R, Cardoso H, Bastir M, Lalueza-Fox C, de la  
1034 Rasilla M, et al. 2017. The growth pattern of Neandertals, reconstructed from a juvenile skeleton from El Sidrón  
1035 (Spain). *Science* (80- ). [Internet] 357:1282 LP-1287. Available from:  
1036 <http://science.sciencemag.org/content/357/6357/1282.abstract>
- 1037

- 1038 Sankararaman S, Mallick S, Dannemann M, Prufer K, Kelso J, Paabo S, Patterson N, Reich D. 2014. The genomic  
1039 landscape of Neanderthal ancestry in present-day humans. *Nature* [Internet] 507:354–357. Available from:  
1040 <http://dx.doi.org/10.1038/nature12961>
- 1041 Sankararaman S, Mallick S, Patterson N, Reich D. 2016. The Combined Landscape of Denisovan and Neanderthal  
1042 Ancestry in Present-Day Humans. *Curr. Biol.* [Internet] 26:1241–1247. Available from:  
1043 <http://dx.doi.org/10.1016/j.cub.2016.03.037>
- 1044 Schlebusch CM, Malmström H, Günther T, Sjödin P, Coutinho A, Edlund H, Munters AR, Vicente M, Steyn M,  
1045 Soodyall H, et al. 2017. Southern African ancient genomes estimate modern human divergence to 350,000 to  
1046 260,000 years ago. *Science* (80-. ). [Internet]. Available from:  
1047 <http://science.sciencemag.org/content/early/2017/09/27/science.aao6266.abstract>
- 1048 Schlebusch CM, Skoglund P, Sjödin P, Gattepaille LM, Hernandez D, Jay F, Li S, De Jongh M, Singleton A, Blum  
1049 MGB, et al. 2012. Genomic Variation in Seven Khoe-San Groups Reveals Adaptation and Complex African  
1050 History. *Science* (80-. ). [Internet] 338:374 LP-379. Available from:  
1051 <http://science.sciencemag.org/content/338/6105/374.abstract>
- 1052 Schoenemann PT. 2004. Brain Size Scaling and Body Composition in Mammals. *Brain. Behav. Evol.* [Internet] 63:47–  
1053 60. Available from: <https://www.karger.com/DOI/10.1159/000073759>
- 1054 Sherry ST, Ward M-H, Kholodov M, Baker J, Phan L, Smigielski EM, Sirotkin K. 2001. dbSNP: the NCBI database of  
1055 genetic variation. *Nucleic Acids Res.* [Internet] 29:308–311. Available from:  
1056 <http://www.ncbi.nlm.nih.gov/pmc/articles/PMC29783/>
- 1057 Sherwood CC, Gómez-Robles A. 2017. Brain Plasticity and Human Evolution. *Annu. Rev. Anthropol.* [Internet]  
1058 46:399–419. Available from: <https://doi.org/10.1146/annurev-anthro-102215-100009>
- 1059 Shi J, Hui L, Xu Y, Wang F, Huang W, Hu G. 2002. Sequence variations in the mu-opioid receptor gene (OPRM1)  
1060 associated with human addiction to heroin. *Hum. Mutat.* [Internet] 19:459–460. Available from:  
1061 <http://doi.wiley.com/10.1002/humu.9026>
- 1062 Shi L, Hu E, Wang Z, Liu J, Li J, Li M, Chen H, Yu C, Jiang T, Su B. 2017. Regional selection of the brain size  
1063 regulating gene CASC5 provides new insight into human brain evolution. *Hum. Genet.* [Internet] 136:193–204.  
1064 Available from: <https://doi.org/10.1007/s00439-016-1748-5>
- 1065 Siegel DA, Huang MK, Becker SF. 2002. Ectopic dendrite initiation: CNS pathogenesis as a model of CNS  
1066 development. *Int. J. Dev. Neurosci.* [Internet] 20:373–389. Available from: <http://www.sciencedirect.com/science/article/pii/S0736574802000552>
- 1067 Signorell A. 2017. DescTools: Tools for Descriptive Statistics. Available from:  
1068 <https://cran.r-project.org/package=DescTools>
- 1069 Simonti CN, Vernot B, Bastarache L, Bottinger E, Carrell DS, Chisholm RL, Crosslin DR, Hebring SJ, Jarvik GP,  
1070 Kullo IJ, et al. 2016. The phenotypic legacy of admixture between modern humans and Neandertals. *Science* (80-  
1071 ). [Internet] 351:737 LP-741. Available from: <http://science.sciencemag.org/content/351/6274/737.abstract>
- 1072 Skeide MA, Friederici AD. 2016. The ontogeny of the cortical language network. *Nat. Rev. Neurosci.* [Internet] 17:323.  
1073 Available from: <http://dx.doi.org/10.1038/nrn.2016.23>
- 1074 Skoglund P, Thompson JC, Prendergast ME, Mittnik A, Sirak K, Hajdinjak M, Salie T, Rohland N, Mallick S, Peltzer A,  
1075 et al. 2017. Reconstructing Prehistoric African Population Structure. *Cell* [Internet] 171:59–71.e21. Available  
1076 from: <http://dx.doi.org/10.1016/j.cell.2017.08.049>
- 1077 Smith BH, Tompkins RL. 1995. Toward A Life History of the Hominidae. *Annu. Rev. Anthropol.* [Internet] 24:257–279.  
1078 Available from: <https://doi.org/10.1146/annurev.an.24.100195.001353>
- 1079 Smith TM, Tafforeau P, Reid DJ, Pouech J, Lazzari V, Zermeno JP, Guatelli-Steinberg D, Olejniczak AJ, Hoffman A,  
1080 Radovic J, et al. 2010. Dental evidence for ontogenetic differences between modern humans and Neanderthals.  
1081 *Proc Natl Acad Sci U S A* [Internet] 107:20923–20928. Available from:  
1082 <http://eutils.ncbi.nlm.nih.gov/entrez/eutils/elink.fcgi?dbfrom=pubmed&id=21078988&retmode=ref&cmd=prlinks%5Cnpapers3://publication/doi/10.1073/pnas.1010906107>
- 1083 Somel M, Franz H, Yan Z, Lorenc A, Guo S, Giger T, Kelso J, Nickel B, Dannemann M, Bahn S, et al. 2009.  
1084 Transcriptional neoteny in the human brain. *Proc. Natl. Acad. Sci. U. S. A.* [Internet] 106:5743–5748. Available  
1085 from: <http://www.pnas.org/content/early/2009/03/20/0900544106>
- 1086 Somel M, Liu X, Khaitovich P. 2013. Human brain evolution: transcripts, metabolites and their regulators. *Nat. Rev.*  
1087 *Neurosci.* [Internet] 14:1–16. Available from:  
1088 <http://dx.doi.org/10.1038/nrn3372%5Cnpapers3://publication/doi/10.1038/nrn3372>
- 1089 Sreedharan S, Almén MS, Carlini VP, Haitina T, Stephansson O, Sommer WH, Heilig M, de Barioglio SR, Fredriksson  
1090 R, Schiöth HB. 2011. The G protein coupled receptor Gpr153 shares common evolutionary origin with Gpr162  
1091 and is highly expressed in central regions including the thalamus, cerebellum and the arcuate nucleus. *FEBS J.*  
1092 [Internet] 278:4881–4894. Available from: <http://dx.doi.org/10.1111/j.1742-4658.2011.08388.x>
- 1093 Stringer C. 2016. The origin and evolution of &#x201c;Homo sapiens&#x201c;. *Philos. Trans. R. Soc. B Biol. Sci.*  
1094 [Internet] 371. Available from: <http://rstb.royalsocietypublishing.org/content/371/1698/20150237.abstract>
- 1095 Suzuki IK, Gacquer D, Van Heurck R, Kumar D, Wojno M, Bilheu A, Herpoel A, Lambert N, Cheron J, Polleux F, et al.  
1096 2018. Human-Specific <em>NOTCH2NL</em> Genes Expand Cortical Neurogenesis through Delta/Notch  
1097 Regulation. *Cell* [Internet] 173:1370–1384.e16. Available from: <https://doi.org/10.1016/j.cell.2018.03.067>
- 1098 Szklarczyk D, Morris JH, Cook H, Kuhn M, Wyder S, Simonovic M, Santos A, Doncheva NT, Roth A, Bork P, et al.  
1099 2017. The STRING database in 2017: quality-controlled protein–protein association networks, made broadly  
1100 accessible. *Nucleic Acids Res.* [Internet] 45:D362–D368. Available from: <http://dx.doi.org/10.1093/nar/gkw937>
- 1101  
1102

- 1103 Takata A, Miyake N, Tsurusaki Y, Fukai R, Miyatake S, Koshimizu E, Kushima I, Okada T, Morikawa M, Uno Y, et al.  
1104 2018. Integrative Analyses of *de novo* Mutations Provide Deeper Biological Insights into Autism  
1105 Spectrum Disorder. *Cell Rep.* [Internet] 22:734–747. Available from:  
1106 <http://dx.doi.org/10.1016/j.celrep.2017.12.074>
- 1107 Takemoto M, Hattori Y, Zhao H, Sato H, Tamada A, Sasaki S, Nakajima K, Yamamoto N. 2011. Laminar and Areal  
1108 Expression of *Unc5d* and Its Role in Cortical Cell Survival. *Cereb. Cortex* [Internet] 21:1925–1934. Available  
1109 from: <http://dx.doi.org/10.1093/cercor/bhq265>
- 1110 Talbot JC, Nichols JT, Yan Y-L, Leonard IF, BreMiller RA, Amacher SL, Postlethwait JH, Kimmel CB. 2016.  
1111 Pharyngeal morphogenesis requires *fras1-itga8*-dependent epithelial-mesenchymal interaction. *Dev. Biol.*  
1112 [Internet] 416:136–148. Available from: <http://www.sciencedirect.com/science/article/pii/S0012160616301051>
- 1113 Tan E, Lim ECP, Teo Y, Lim Y, Law H, Sia AT. 2009. Ethnicity and OPRM variant independently predict pain  
1114 perception and patient-controlled analgesia usage for post-operative pain. *Mol. Pain* [Internet] 5:32. Available  
1115 from: <http://www.ncbi.nlm.nih.gov/pmc/articles/PMC2709614/>
- 1116 Tang S, Wang X, Li W, Yang X, Li Z, Liu W, Li C, Zhu Z, Wang L, Wang J, et al. 2017. Biallelic Mutations in  
1117 *CFAP43* and *CFAP44* Cause Male Infertility with Multiple Morphological Abnormalities  
1118 of the Sperm Flagella. *Am. J. Hum. Genet.* [Internet] 100:854–864. Available from:  
1119 <http://dx.doi.org/10.1016/j.ajhg.2017.04.012>
- 1120 Tashima T, Nagatoishi S, Sagara H, Ohnuma S, Tsumoto K. 2015. Osteomodulin regulates diameter and alters shape of  
1121 collagen fibrils. *Biochem. Biophys. Res. Commun.* [Internet] 463:292–296. Available from:  
1122 <http://www.sciencedirect.com/science/article/pii/S0006291X15009699>
- 1123 Teves ME, Sundaresan G, Cohen DJ, Hyzy SL, Kajan I, Maczis M, Zhang Z, Costanzo RM, Zweit J, Schwartz Z, et al.  
1124 2015. *Spag17* Deficiency Results in Skeletal Malformations and Bone Abnormalities. *PLoS One* [Internet]  
1125 10:e0125936. Available from: <https://doi.org/10.1371/journal.pone.0125936>
- 1126 Torres JZ, Summers MK, Peterson D, Brauer MJ, Lee J, Senese S, Gholkar AA, Lo Y-C, Lei X, Jung K, et al. 2017. The  
1127 *STARD9/Kif16a* Kinesin Associates with Mitotic Microtubules and Regulates Spindle Pole Assembly. *Cell*  
1128 [Internet] 147:1309–1323. Available from: <http://dx.doi.org/10.1016/j.cell.2011.11.020>
- 1129 Trinkaus E, Howells WW. 1979. The Neanderthals. *Sci. Am.* [Internet] 241:118–133. Available from:  
1130 <http://www.jstor.org/stable/24965359>
- 1131 Varki A, Altheide TK. 2005. Comparing the human and chimpanzee genomes: Searching for needles in a haystack.  
1132 *Genome Res.* [Internet] 15:1746–1758. Available from: <http://genome.cshlp.org/content/15/12/1746.long>
- 1133 Verheijen MHG, Camargo N, Verdier V, Nadra K, de Preux Charles A-S, Médard J-J, Luoma A, Crowther M, Inouye H,  
1134 Shimano H, et al. 2009. *SCAP* is required for timely and proper myelin membrane synthesis. *Proc. Natl. Acad.*  
1135 *Sci.* [Internet] 106:21383–21388. Available from: <http://www.pnas.org/content/106/50/21383.abstract>
- 1136 Vernot B, Akey JM. 2014. Resurrecting Surviving Neandertal Lineages from Modern Human Genomes. *Science* (80-. ).  
1137 [Internet] 343:1017–1021. Available from: <http://science.sciencemag.org/content/343/6174/1017.abstract>
- 1138 Vernot B, Tucci S, Kelso J, Schraiber JG, Wolf AB, Gittelman RM, Dannemann M, Grote S, McCoy RC, Norton H, et  
1139 al. 2016. Excavating Neandertal and Denisovan DNA from the genomes of Melanesian individuals. *Science*  
1140 (80-. ). [Internet] 352:235–239. Available from: <http://science.sciencemag.org/content/352/6282/235.abstract>
- 1141 Verzi MP, Agarwal P, Brown C, McCulley DJ, Schwarz JJ, Black BL. 2007. The Transcription Factor *MEF2C* Is  
1142 Required for Craniofacial Development. *Dev. Cell* [Internet] 12:645–652. Available from:  
1143 <http://dx.doi.org/10.1016/j.devcel.2007.03.007>
- 1144 Wang C, Liang C-C, Bian ZC, Zhu Y, Guan J-L. 2013. *FIP200* is required for maintenance and differentiation of  
1145 postnatal neural stem cells. *Nat. Neurosci.* [Internet] 16:532. Available from: <http://dx.doi.org/10.1038/nn.3365>
- 1146 Wang R, Chen C-C, Hara E, Rivas M V, Rouilhac PL, Howard JT, Chakraborty M, Audet J-N, Jarvis ED. 2015.  
1147 Convergent Differential Regulation of *SLIT-ROBO* Axon Guidance Genes in the Brains of Vocal Learners. *J.*  
1148 *Comp. Neurol.* [Internet] 523:892–906. Available from: <http://www.ncbi.nlm.nih.gov/pmc/articles/PMC4329046/>
- 1149 Wang Z, Widgren EE, Sivashanmugam P, O’Rand MG, Richardson RT. 2005. Association of *Eppin* with Semenogelin  
1150 on Human Spermatozoa1. *Biol. Reprod.* [Internet] 72:1064–1070. Available from:  
1151 <http://dx.doi.org/10.1095/biolreprod.104.036483>
- 1152 Weyer S, Pääbo S. 2016. Functional Analyses of Transcription Factor Binding Sites that Differ between Present-Day  
1153 and Archaic Humans. *Mol. Biol. Evol.* [Internet] 33:316–322. Available from:  
1154 <http://dx.doi.org/10.1093/molbev/msv215>
- 1155 Widagdo J, Fang H, Jang SE, Anggono V. 2016. *PACSIN1* regulates the dynamics of AMPA receptor trafficking. *Sci.*  
1156 *Rep.* [Internet] 6:31070. Available from: <http://dx.doi.org/10.1038/srep31070>
- 1157 Wray GA. 2007. The evolutionary significance of cis-regulatory mutations. *Nat. Rev. Genet.* [Internet] 8:206. Available  
1158 from: <http://dx.doi.org/10.1038/nrg2063>
- 1159 Wu Y, Sheng W, Chen L, Dong H, Lee V, Lu F, Wong CS, Lu W-Y, Yang BB. 2004. *Versican V1* Isoform Induces  
1160 Neuronal Differentiation and Promotes Neurite Outgrowth. *Mol. Biol. Cell* [Internet] 15:2093–2104. Available  
1161 from: <http://www.molbiolcell.org/content/15/5/2093.abstract>
- 1162 Wynn T, Coolidge FL. 2004. The expert Neandertal mind. *J. Hum. Evol.* [Internet] 46:467–487. Available from:  
1163 <http://www.sciencedirect.com/science/article/pii/S0047248404000302>
- 1164 Wynn T, Overmann K, Coolidge F. 2016. The false dichotomy: a refutation of the Neandertal indistinguishability claim.  
1165 *J. Anthropol. Sci. = Riv. di Antropol. JASS* [Internet] 94:201–221. Available from: <http://europepmc.org/abstract/MED/26708102>
- 1166

- 1167 Yan G, Zhang G, Fang X, Zhang Y, Li C, Ling F, Cooper DN, Li Q, Li Y, van Gool AJ, et al. 2011. Genome sequencing  
1168 and comparison of two nonhuman primate animal models, the cynomolgus and Chinese rhesus macaques. *Nat.*  
1169 *Biotechnol.* [Internet] 29:1019. Available from: <http://dx.doi.org/10.1038/nbt.1992>
- 1170 Yap CC, Vakulenko M, Kruczek K, Motamedi B, Digilio L, Liu JS, Winckler B. 2012. Doublecortin (DCX) Mediates  
1171 Endocytosis of Neurofascin Independently of Microtubule Binding. *J. Neurosci.* [Internet] 32:7439 LP-7453.  
1172 Available from: <http://www.jneurosci.org/content/32/22/7439.abstract>
- 1173 Yoshida MM, Azuma Y. 2016. Mechanisms behind Topoisomerase II SUMOylation in chromosome segregation. *Cell*  
1174 *Cycle* [Internet] 15:3151–3152. Available from: <https://doi.org/10.1080/15384101.2016.1216928>
- 1175 Zachos G, Black EJ, Walker M, Scott MT, Vagnarelli P, Earnshaw WC, Gillespie DAF. 2017. Chk1 Is Required for  
1176 Spindle Checkpoint Function. *Dev. Cell* [Internet] 12:247–260. Available from:  
1177 <http://dx.doi.org/10.1016/j.devcel.2007.01.003>
- 1178 Zhang H, Meltzer P, Davis S. 2013. RCircos: an R package for Circos 2D track plots. *BMC Bioinformatics* [Internet]  
1179 14:244. Available from: <https://doi.org/10.1186/1471-2105-14-244>
- 1180 Zhang X, Ting K, Pathmanathan D, Ko T, Chen W, Chen F, Lee H, James AW, Siu RK, Shen J, et al. 2012. Calvarial  
1181 Cleidocraniodysplasia-Like Defects With ENU-Induced Nell-1 Deficiency. *J. Craniofac. Surg.* [Internet] 23.  
1182 Available from: [https://journals.lww.com/jcraniofacialsurgery/Fulltext/2012/01000/  
1183 Calvarial\\_Cleidocraniodysplasia\\_Like\\_Defects\\_With.16.aspx](https://journals.lww.com/jcraniofacialsurgery/Fulltext/2012/01000/Calvarial_Cleidocraniodysplasia_Like_Defects_With.16.aspx)
- 1184 Zhang Y, Su J, Yu J, Bu X, Ren T, Liu X, Yao L. 2011. An essential role of discoidin domain receptor 2 (DDR2) in  
1185 osteoblast differentiation and chondrocyte maturation via modulation of Runx2 activation. *J. Bone Miner. Res.*  
1186 [Internet] 26:604–617. Available from: <http://doi.wiley.com/10.1002/jbmr.225>
- 1187 Zhou H, Hu S, Matveev R, Yu Q, Li J, Khaitovich P, Jin L, Lachmann M, Stoneking M, Fu Q, et al. 2015. A  
1188 Chronological Atlas of Natural Selection in the Human Genome during the Past Half-million Years. *bioRxiv*  
1189 [Internet]. Available from: <http://biorxiv.org/content/early/2015/06/19/018929.abstract>
- 1190 Zhu G-Z, Lin Y, Myles DG, Primakoff P. 1999. Identification of four novel ADAMs with potential roles in  
1191 spermatogenesis and fertilization. *Gene* [Internet] 234:227–237. Available from:  
1192 <http://www.sciencedirect.com/science/article/pii/S0378111999002085>  
1193  
1194

# The Homo tree

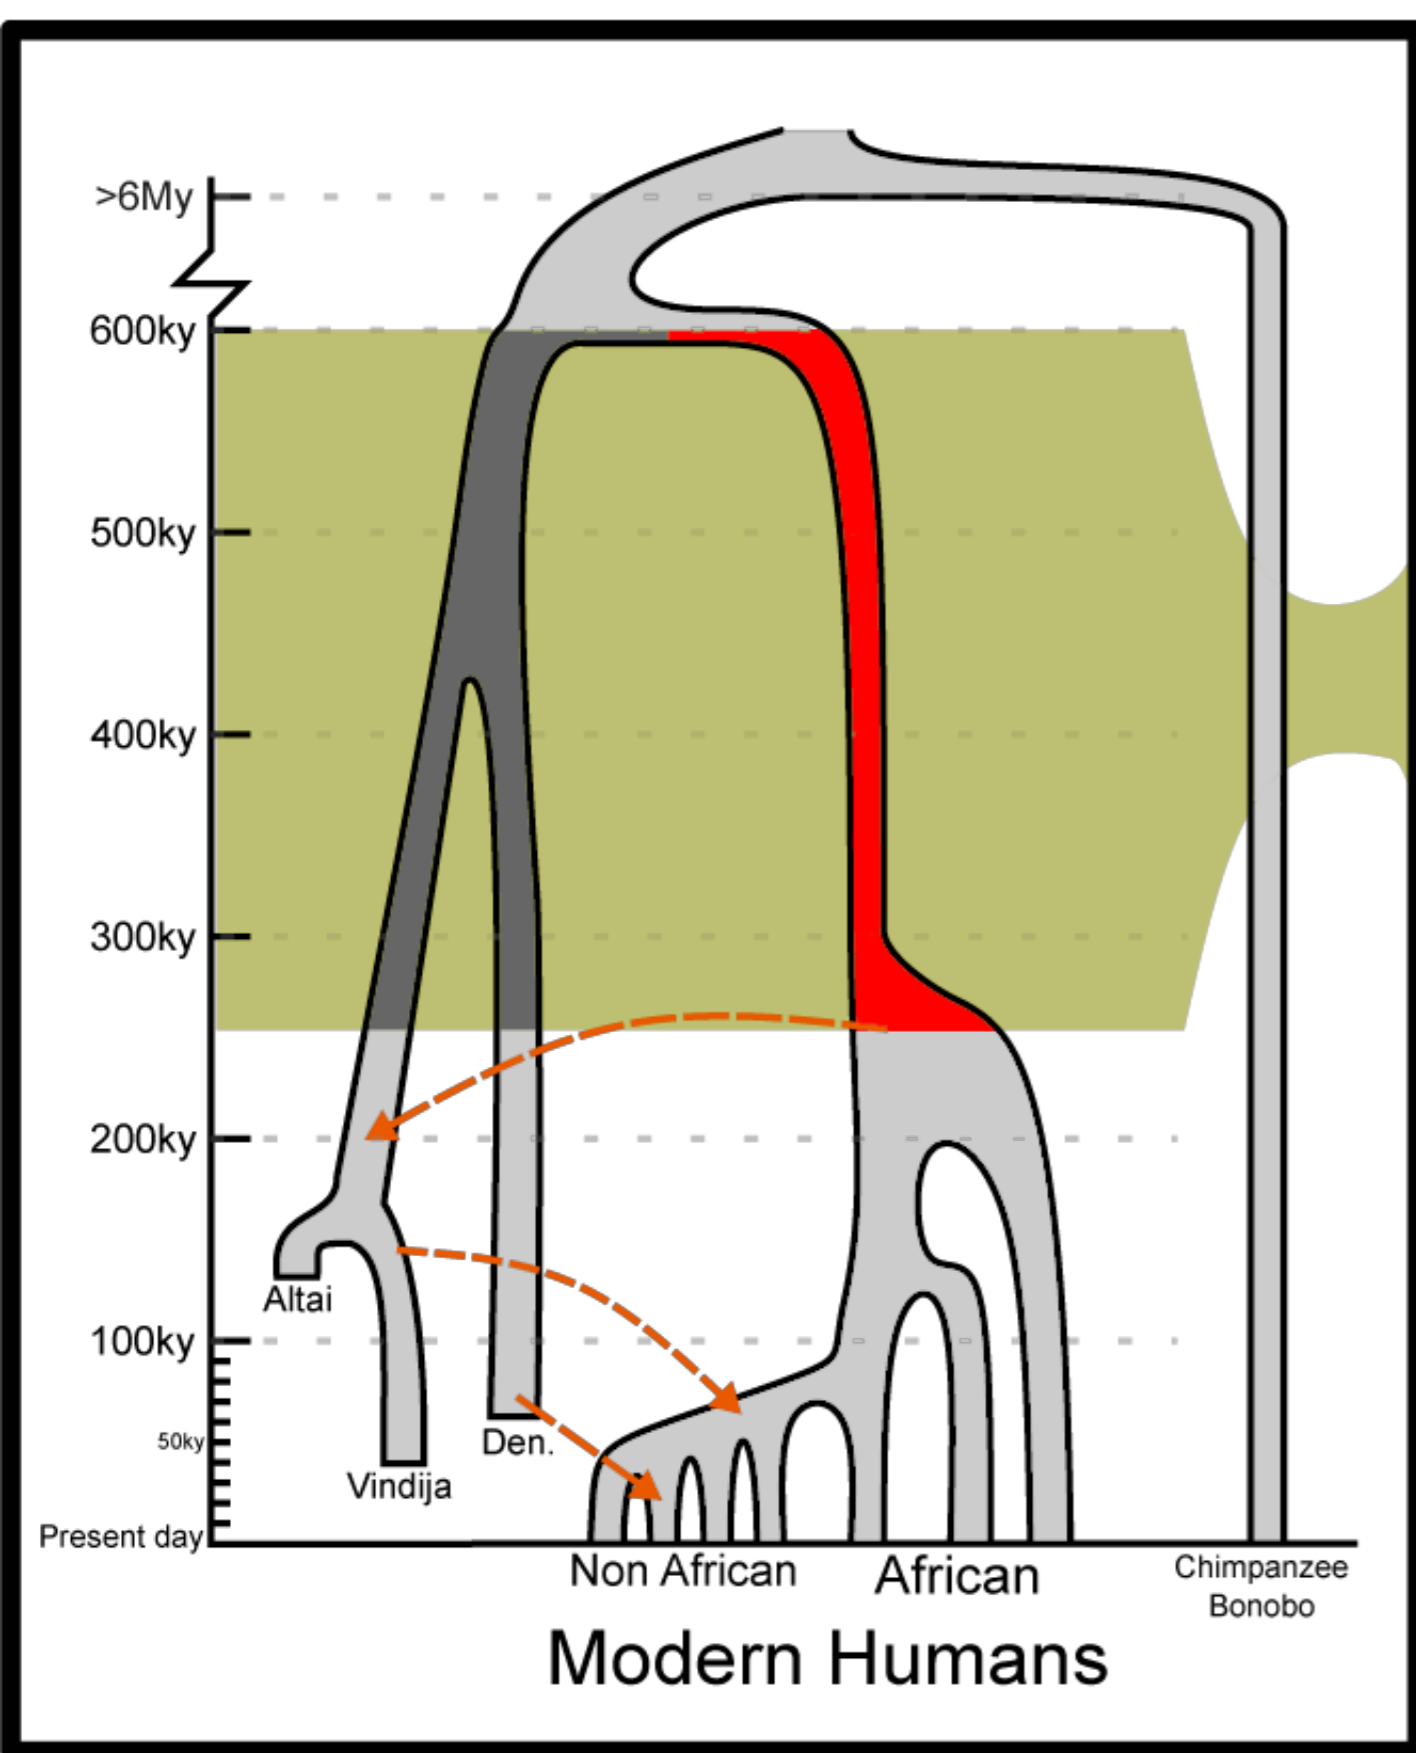

# Changes in humans

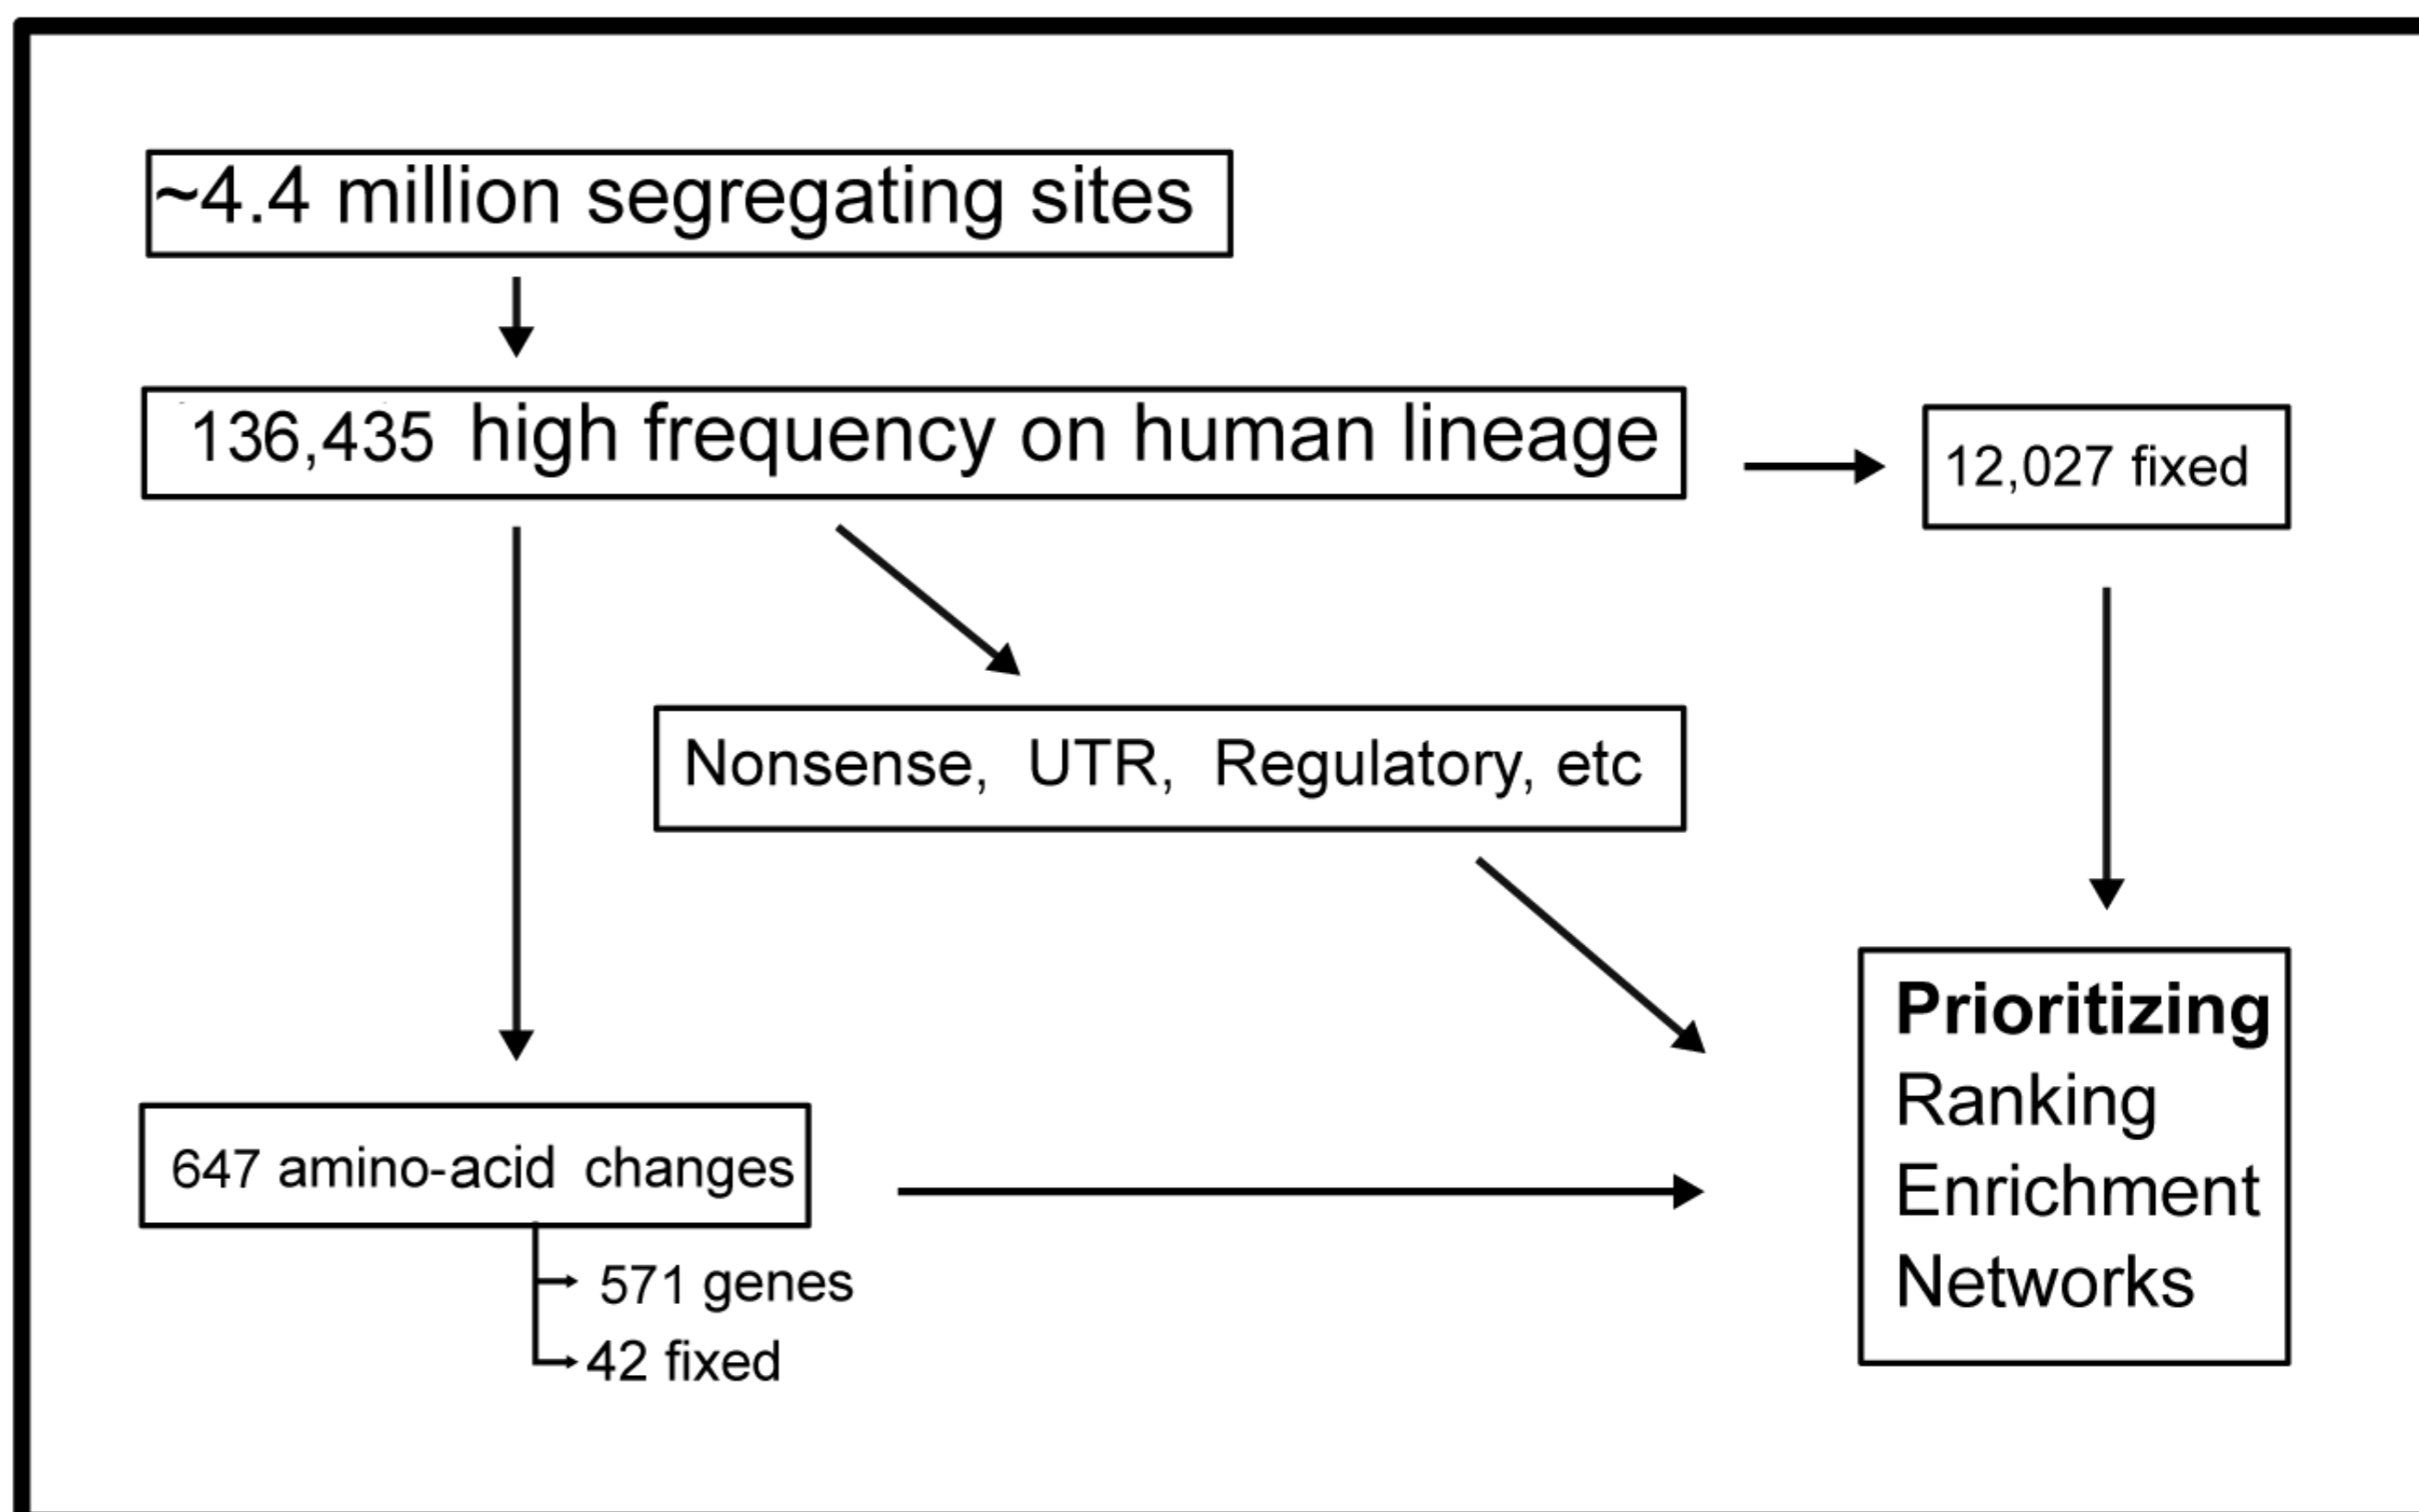

## Spindles & Cells

Mitotic Spindle

Neurogenesis

bioRxiv preprint doi: <https://doi.org/10.1101/299950>; this version posted January 20, 2019. The copyright holder for this preprint (which was not certified by peer review) is the author/funder, who has granted bioRxiv a license to display the preprint in perpetuity. It is made available under aCC-BY-NC-ND 4.0 International license.

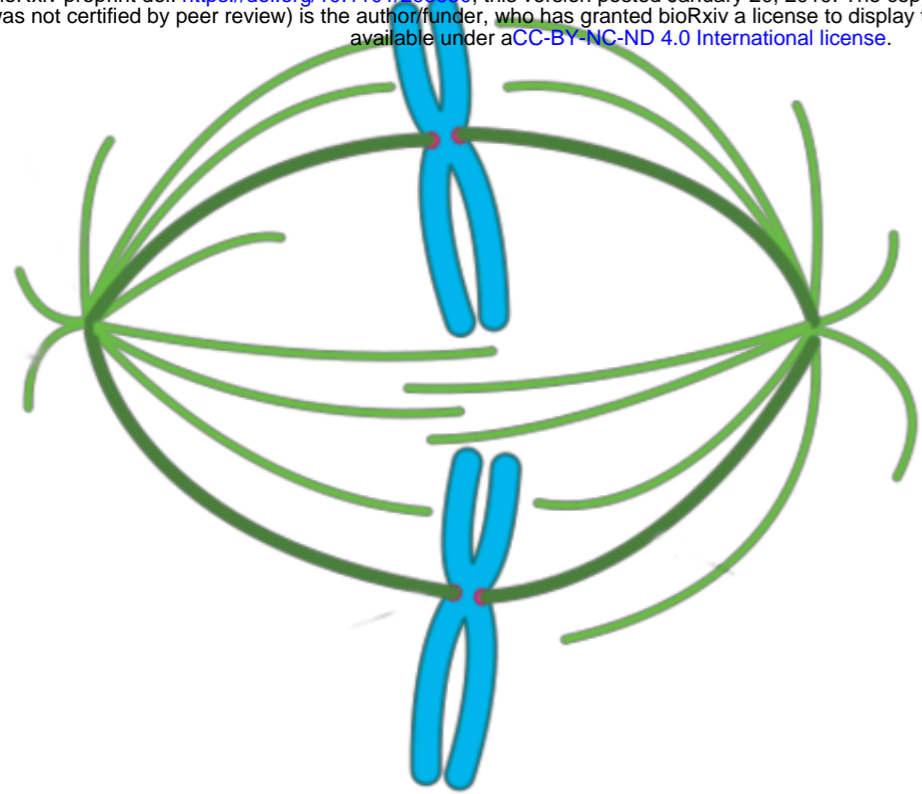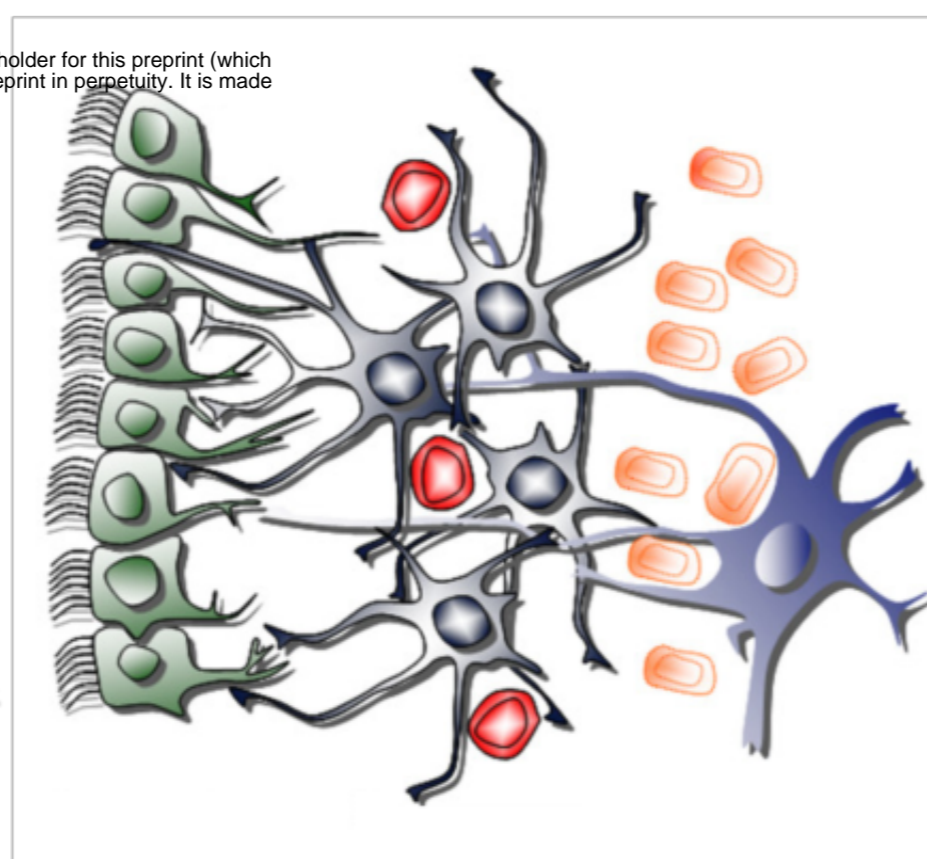

## Brain & Bones

Brain growth

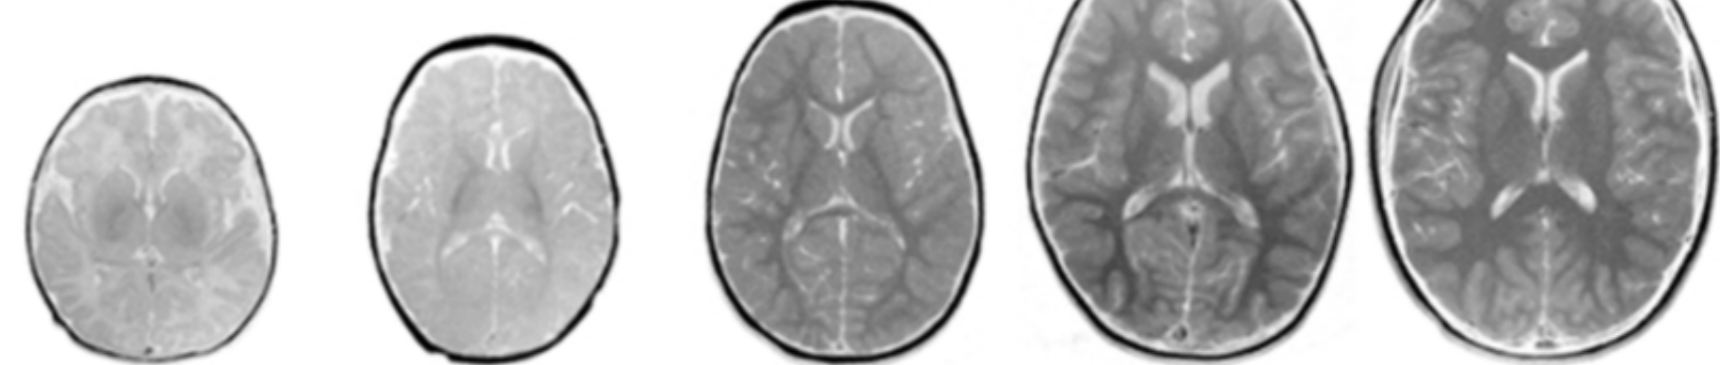

Craniofacial features

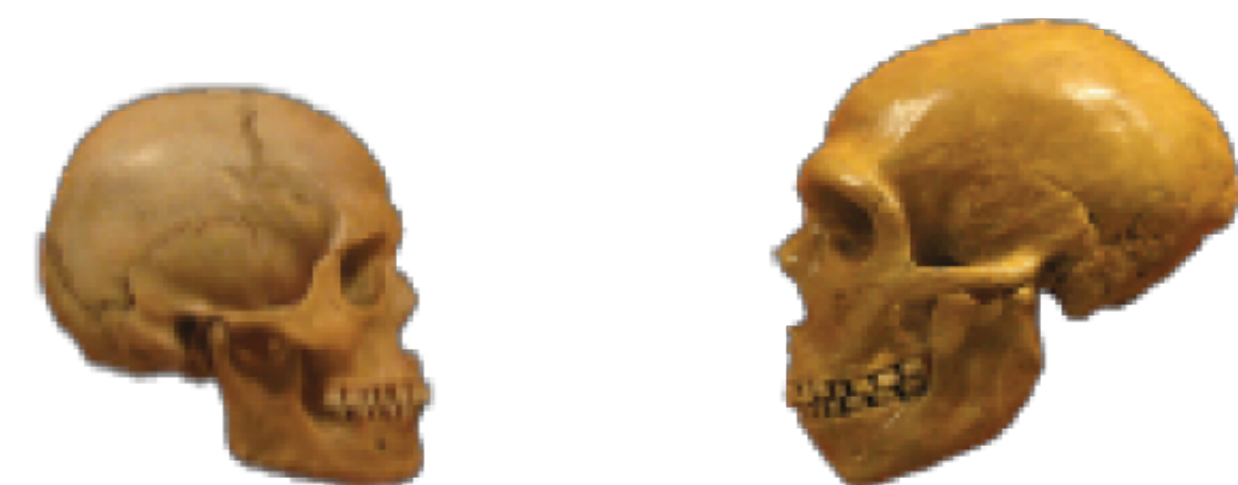

## Complex traits

Life history

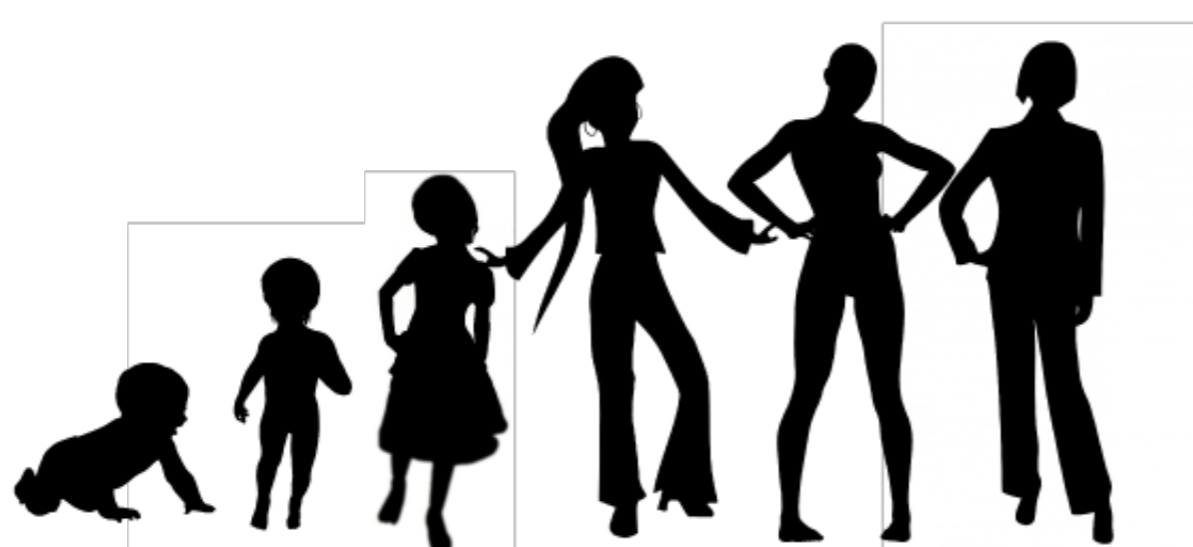

Language & cognition

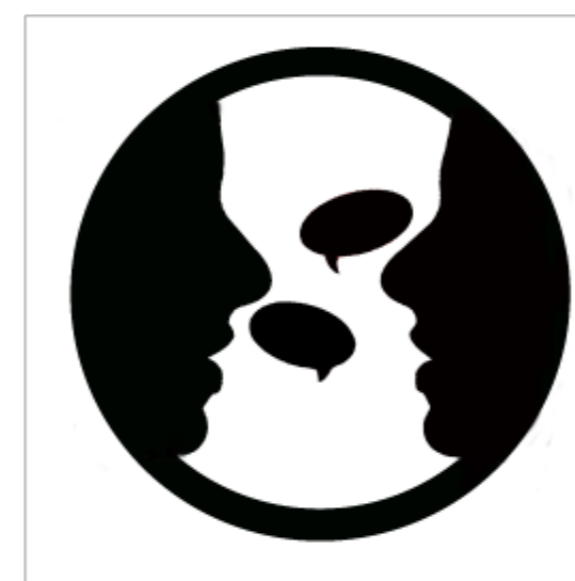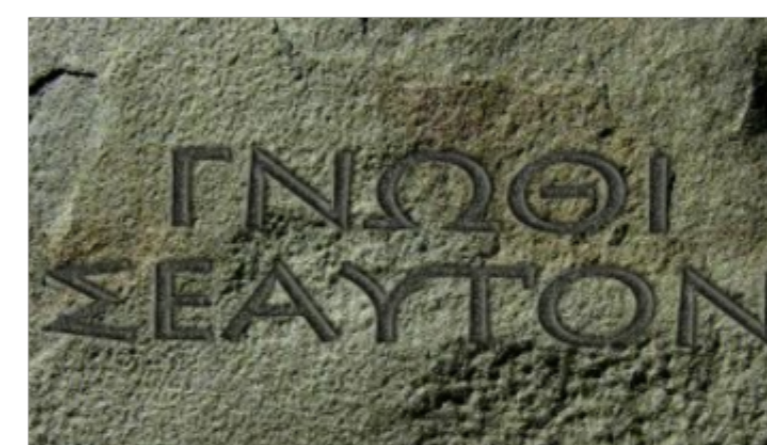

Source: https://www.biorxiv.org/content/10.1101/298950v2.full.pdf
